# Supplementary material for: National trends in hospital-acquired preventable adverse events after major cancer surgery in the USA
Source: PubMed Central journal article supplement — BMJ Open. 2013 Jun 25;3(6):e002843. doi: 10.1136/bmjopen-2013-002843 (PMC3696870; doi:10.1136/bmjopen-2013-002843), 2013-06-25
Supplement: bmjopen-2013-002843.draft_revisions.pdf [file bmjopen-2013-002843.draft_revisions.pdf]

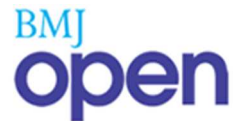

**NATIONAL TRENDS IN HOSPITAL-ACQUIRED PREVENTABLE  
ADVERSE EVENTS AFTER MAJOR CANCER SURGERY IN THE  
UNITED STATES**

|                                    |                                                                                                                                                                                                                                                  |
|------------------------------------|--------------------------------------------------------------------------------------------------------------------------------------------------------------------------------------------------------------------------------------------------|
| Journal:                           | <i>BMJ Open</i>                                                                                                                                                                                                                                  |
| Manuscript ID:                     | bmjopen-2013-002843                                                                                                                                                                                                                              |
| Article Type:                      | Research                                                                                                                                                                                                                                         |
| Date Submitted by the Author:      | 08-Mar-2013                                                                                                                                                                                                                                      |
| Complete List of Authors:          | Sukumar, Shyam<br>Rogmann, Florian<br>Trinh, Vincent<br>Sammons, Jesse<br>Gervais, Mai-Kim<br>Tan, Hung-Jui<br>Ravi, Praful<br>Kim, Simon<br>Hu, Jim<br>Karakiewicz, Pierre<br>Noldus, Joachim<br>Sun, Maxine<br>Menon, Mani<br>Trinh, Quoc-Dien |
| <b>Primary Subject<br>Heading</b>: | Epidemiology                                                                                                                                                                                                                                     |
| Secondary Subject Heading:         | Surgery                                                                                                                                                                                                                                          |
| Keywords:                          | Quality in health care < HEALTH SERVICES ADMINISTRATION & MANAGEMENT, Patient Safety Indicators, Cancer surgery, Preventable Adverse Events, Patient Safety Indicators, Quality Improvement                                                      |
|                                    |                                                                                                                                                                                                                                                  |

SCHOLARONE™  
Manuscripts

# NATIONAL TRENDS IN HOSPITAL-ACQUIRED PREVENTABLE ADVERSE EVENTS AFTER MAJOR CANCER SURGERY IN THE UNITED STATES

Shyam Sukumar<sup>1\*</sup>, Florian Roghmann<sup>2, 3\*</sup>, Vincent Q. Trinh<sup>2</sup>, Jesse D. Sammon<sup>1</sup>, Mai-Kim Gervais<sup>4</sup>, Hung-Jui Tan<sup>5</sup>, Praful Ravi<sup>1</sup>, Simon P. Kim<sup>6</sup>, Jim C. Hu<sup>7</sup>, Pierre I. Karakiewicz<sup>2</sup>, Joachim Noldus<sup>3</sup>, Maxine Sun<sup>2</sup>, Mani Menon<sup>1</sup>, Quoc-Dien Trinh<sup>1,2,8</sup>

\*Denotes equal contribution

<sup>1</sup>Center for Outcomes Research and Analytics, Henry Ford Health System, Detroit, MI, USA

<sup>2</sup>Cancer Prognostics and Health Outcomes Unit, University of Montreal Health Center, Montreal, Canada

<sup>3</sup>Department of Urology, Ruhr University Bochum, Marienhospital, Herne, Germany

<sup>4</sup>Division of General Surgery, University of Montreal Health Center, Montreal, Canada

<sup>5</sup>Dow Division of Health Services Research, University of Michigan, Ann Arbor, MI, USA

<sup>6</sup>Department of Urology, Mayo Clinic, Rochester, MN, USA

<sup>7</sup>Department of Urology, David Geffen School of Medicine, University of California, Los Angeles, Los Angeles, CA, USA

<sup>8</sup>CRCHUM, Centre Hospitalier de l'Université de Montréal, Montreal, Canada

## **Address all correspondence to:**

Florian Roghmann, MD  
Cancer Prognostics and Health Outcomes Unit  
264 blvd. Rene-Levesque E. suite 228  
Montreal, QC, H2X 1P1, Canada  
Tel: 514-890-8000 ext: 35335  
Fax: 514-227-5103  
Email: [f.roghmann@gmail.com](mailto:f.roghmann@gmail.com)

**Word count:** abstract (260), manuscript (2954, excluding title page, abstract, references, figures, figure legends and tables), 25 pages, 28 references, 4 tables, 2 figures, 1 appendix

**Keywords:** Patient Safety Indicators; Preventable Adverse Events; Surgery; Quality of Care; Cancer surgery; Quality Improvement; Hospital Acquired Adverse Events

**Running Head:** Preventable Adverse Events after Cancer Surgery

1  
2  
3  
4  
5  
6  
7  
8  
9  
10  
11  
12  
13  
**Contributorship Statement:** Everyone listed as an author for this manuscript fulfils all three of the ICMJE guidelines for authorship. All authors have made substantial contributions to each of the following categories:

1. Conception and design, acquisition of data, or analysis and interpretation of data
2. Drafting the article or revising it critically for important intellectual content
3. Final approval of the version to be published.

14  
15  
16  
17  
18  
19  
20  
21  
22  
23  
24  
25  
26  
27  
28  
I, Florian Roghmann, the Corresponding Author of this article contained within the original manuscript which includes any diagrams & photographs, other illustrative material, video, film or any other material howsoever submitted by the Contributors at any time and related to the Contribution have the right to grant on behalf of all authors and do grant on behalf of all authors, a licence to the BMJ Publishing Group Ltd and its licensees, to permit this Contribution (if accepted) to be published in BMJ Open and any other BMJ Group products and to exploit all subsidiary rights, as set out in the licence at:

([http://group.bmj.com/products/journals/instructions-for-authors/BMJOpen\\_licence.pdf](http://group.bmj.com/products/journals/instructions-for-authors/BMJOpen_licence.pdf))

29  
30  
31  
32  
33  
34  
35  
36  
37  
38  
39  
40  
41  
42  
43  
44  
45  
46  
47  
48  
49  
50  
51  
52  
53  
54  
55  
56  
57  
58  
59  
60  
**Data sharing:** There is no additional data available.

**ABSTRACT**

**Objectives:** While multiple studies have demonstrated variations in the quality of cancer-care in the U.S., payers are increasingly assessing structure-and process-level measures to promote quality improvement. Hospital-acquired-adverse events are one such measure and we examine their national trends after major cancer surgery.

**Design:** Retrospective, cross-sectional analysis of a weighted-national estimate from the Nationwide Inpatient Sample undergoing major oncological procedures (colectomy, cystectomy, esophagectomy, gastrectomy, hysterectomy, lung resection, pancreatectomy and prostatectomy). The Agency for Healthcare Research and Quality Patient Safety Indicators (PSIs) were utilized to identify trends in hospital-acquired-adverse events.

**Setting:** Secondary and tertiary care, U.S. hospitals in the Nationwide Inpatient Sample (NIS)

**Participants:** A weighted-national estimate of 2,508,917 patients (>18 years, 1999-2009) from the NIS.

**Primary outcome measures:** Hospital-acquired-adverse events.

**Results:** 324,852 patients experienced  $\geq 1$ -PSI event (12.9%). Patients with  $\geq 1$ -PSI experienced higher-rates of in-hospital mortality (OR: 19.38, 95% CI: 18.44-20.37), prolonged length-of-stay (OR: 4.43, 95%CI: 4.31-4.54) and excessive hospital-charges (OR: 5.21, 95%CI: 5.10-5.32). Patients treated at lower-volume hospitals experienced both higher PSI-events *and* failure-to-rescue rates. While a steady increase in the frequency of PSI-events after major cancer surgery has

1  
2  
3 occurred over the last 10 years (estimated annual % change-EAPC: 3.5%,  
4  
5 p<0.001), a concomitant decrease in failure-to-rescue rates (EAPC: -3.01%) and  
6  
7 overall mortality (EAPC: -2.30%) was noted. (All p<0.001)  
8  
9

10 **Conclusions:** Over the past decade, there has been a substantial increase in  
11  
12 the national frequency of potentially avoidable adverse-events after major cancer  
13  
14 surgery, with a detrimental effect on numerous outcome-level measures.  
15  
16 However, there was a concomitant reduction in failure-to-rescue rates and  
17  
18 overall-mortality rates. Policy changes to improve the increasing burden of  
19  
20 specific adverse events, such as postoperative sepsis, pressure ulcers and  
21  
22 respiratory failure, are required.  
23  
24  
25  
26  
27  
28  
29  
30  
31  
32  
33  
34  
35  
36  
37  
38  
39  
40  
41  
42  
43  
44  
45  
46  
47  
48  
49  
50  
51  
52  
53  
54  
55  
56  
57  
58  
59  
60

## Article summary

### Article focus

- Variations in the quality of surgical oncology care in the U.S. remain unclear.
- Payers are increasingly assessing structure-and process-level measures to promote quality improvement.
- Hospital-acquired-adverse events are one such measure and we examine their national trends after major cancer surgery.

### Key messages

- Over the past decade, there has been a substantial increase in the national frequency of potentially avoidable adverse-events after major cancer surgery but there was also a concomitant reduction in failure-to-rescue rates and overall-mortality rates.
- Patients treated at lower-volume hospitals experienced both higher frequency of potentially avoidable adverse-events *and* failure-to-rescue rates.
- Policy changes to improve the increasing burden of specific adverse events, such as postoperative sepsis, pressure ulcers and respiratory failure, are required.

### Strength and limitations of this study

- This is the largest study to assess the quality of oncologic surgical care in a nationally representative cohort of U.S. patients.
- Validated Agency for Healthcare Research and Quality Patient Safety Indicators (PSIs) were utilized to identify trends in hospital-acquired-adverse events.
- Inherent to retrospective analyses of large administrative datasets, this study is limited by potential biases due to case-mix and miscoding.
- While PSIs have been shown to perform well as screening tools from an epidemiologic perspective (over-identification and few false-negatives), concerns related to high false-positive rates exist.

## INTRODUCTION

There has been much interest in assessing the downstream effects and complexities of the contemporary delivery of health care. However, observational studies examining preventable adverse events are confounded by the loss of information when administrative data are abstracted from patient records. Recently, several initiatives have been directed to improve consistency, relevance and fidelity in the process of transforming clinical data into administrative datasets and subsequent practice-changing results. Following a landmark study by Iezzoni *et al*<sup>1</sup> on computerized algorithms to identify quality of care disparities in administrative datasets, the Agency for Healthcare Research and Quality (AHRQ) developed a standardized system for accrual and reporting of unintended hospital-acquired adverse events, termed patient safety indicators (PSI)<sup>2</sup>. Subsequently, Zhan *et al*<sup>3</sup> examined the relationship between multiple process-, setting- and outcome-level measures and adverse events identified using the AHRQ's PSI system, and reported substantial but variable effects on the health care system.

Nonetheless, there is a paucity of studies evaluating the burden of preventable adverse events and this is particularly true for major surgical oncology care in the United States. Multiple studies have demonstrated that significant variation exists in cancer incidence rates<sup>4</sup> and in access to quality cancer care<sup>5 6</sup>, but variations in the actual *quality* of surgical oncology care remain unclear.

Hence, we undertook a national assessment of the quality of major surgical oncology care within a standardized framework of preventable adverse events to



1  
2  
3 examine trends in patient safety within the United States. We also evaluate the  
4 prevailing hypothesis<sup>7-9</sup> explaining the volume-complication-mortality relationship,  
5 which states that higher mortality rates for patients undergoing surgery at low-  
6 volume hospitals is preferentially explained by higher failure-to-rescue rates (i.e.  
7 mortality after a hospital-acquired adverse event), rather than a higher incidence  
8 of such adverse events in the first place.  
9  
10  
11  
12  
13  
14  
15  
16  
17  
18  
19  
20  
21  
22  
23  
24  
25  
26  
27  
28  
29  
30  
31  
32  
33  
34  
35  
36  
37  
38  
39  
40  
41  
42  
43  
44  
45  
46  
47  
48  
49  
50  
51  
52  
53  
54  
55  
56  
57  
58  
59  
60

## **METHODS**

### **Data source**

The Nationwide Inpatient Sample (NIS) consists of an array of longitudinal hospital inpatients datasets as part of the Healthcare Cost and Utilization Project (HCUP). It was established by the Agency for Healthcare Research and Quality and functions through a Federal-state affiliation. It is the largest publicly accessible all-payer inpatient database<sup>10</sup>. The database consists of discharge information from 8 million inpatient visits and patients covered by multiple insurance types (including Medicare, Medicaid, private insurance and uninsured patients) are represented.

### **Study cohort**

We relied on hospital discharges for patients undergoing one of eight major cancer surgeries in the United States between 1999-2009. The major oncological surgeries consisted of colectomy, cystectomy, esophagectomy, gastrectomy, hysterectomy, pneumonectomy/lobectomy, pancreatectomy, and prostatectomy. Oncological indications were selected based on ICD-9-CM diagnostic codes. These particular procedures were chosen based on procedure volume and care was taken to include cancer surgeries involving different organ systems across a range of surgical specialties.

### **Patient and Hospital information**

1  
2  
3 Patient characteristics evaluated included age at inpatient hospitalization, race,  
4  
5 gender, insurance characteristics and comorbidities. Regarding race, patients  
6  
7 were classified as White, Black, Hispanic and Other (Asian or Pacific Islander,  
8  
9 Native American). Regarding insurance characteristics patients were categorized  
10  
11 based on the primary payer: Medicare, Medicaid, Private insurance (Blue Cross,  
12  
13 commercial carriers, private HMO's and PPO's), and other insurance types  
14  
15 (including uninsured patients). Charlson Comorbidity index (CCI) was derived  
16  
17 according to Charlson *et al*<sup>11</sup>, and adapted according to the previously defined  
18  
19 methodology of Deyo and colleagues<sup>12</sup>. Median household income of the  
20  
21 patient's ZIP code of residence, as derived from the US Census, was used as to  
22  
23 define socioeconomic status and patients were divided into quartiles: <25,000\$,  
24  
25 25,000\$–34,999\$, 35,000\$–44,999\$, and ≥45,000\$. Hospital information  
26  
27 examined included hospital location (urban vs. rural) and region (Northeast,  
28  
29 Midwest, South and West), as defined by the United States Census Bureau<sup>13</sup> and  
30  
31 academic teaching status as derived from the AHA Annual Survey of Hospitals.  
32  
33 Hospital volume was categorized into volume quartiles as previously described<sup>14</sup>.  
34  
35  
36  
37  
38  
39  
40  
41  
42  
43

### 44 **Primary Outcomes**

45  
46 The Agency for Healthcare Research and Quality (AHRQ) Patient Safety  
47  
48 Indicators (PSIs) were used to identify potentially preventable hospital-acquired  
49  
50 adverse events. For the PSI project, AHRQ commissioned experts from the  
51  
52 Evidence based Practice Center at the University of California San Francisco and  
53  
54 Stanford University and from the University of California Davis to evaluate the  
55  
56  
57  
58  
59  
60

1  
2  
3 existing literature and help develop an evidence-based approach for improving  
4 patient safety<sup>2</sup>. The objective of this project was to facilitate the identification,  
5  
6 quantification and reporting of preventable hospital-acquired adverse events from  
7  
8 routinely collected administrative information. The process of identification of PSI  
9  
10 included initial literature analysis of previously reported patient safety problems,  
11  
12 organized peer review of chosen PSIs, structured review of ICD-9 codes for each  
13  
14 PSI and finally empirical analysis of each PSI, and feedback from  
15  
16 multidisciplinary teams (physicians and specialists, nurses, pharmacists and  
17  
18 coding and experts)<sup>2</sup>. The complete set of PSIs utilized is displayed in **Table e1**  
19  
20 and is available on the AHRQ website<sup>15</sup>. The list includes various preventable  
21  
22 adverse events that have been shown to have reasonable accuracy and validity  
23  
24 as indicators for enhancing quality improvement and patient safety.  
25  
26  
27  
28  
29  
30  
31  
32  
33

### 34 **Statistical Analysis**

35  
36 Proportions, frequencies, means, medians, standard deviation, and interquartile  
37  
38 ranges were obtained for each variable. National trends in the frequency of PSI-  
39  
40 events, failure-to-rescue (defined as mortality after a PSI-event), and in-hospital  
41  
42 mortality were also analyzed as the estimated annual percentage change  
43  
44 (EAPC), based on the linear regression methodology described by Anderson *et*  
45  
46 *al*<sup>16</sup>. Logistic regression models were used to examine predictors of PSI events,  
47  
48 and to examine the effect of PSI events on multiple outcomes level measures,  
49  
50 including in-hospital mortality, excessive charges ( $\geq 75^{\text{th}}$  percentile of inflation  
51  
52 adjusted charges for each individual procedure) and prolonged length of stay  
53  
54  
55  
56  
57  
58  
59  
60

1  
2  
3  
4  
5  
6  
7  
8  
9  
10  
11  
12  
13  
14  
15  
16  
17  
18  
19  
20  
21  
22  
23  
24  
25  
26  
27  
28  
29  
30  
31  
32  
33  
34  
35  
36  
37  
38  
39  
40  
41  
42  
43  
44  
45  
46  
47  
48  
49  
50  
51  
52  
53  
54  
55  
56  
57  
58  
59  
60

(≥75<sup>th</sup> percentile of each individual procedure). Subsequently, we examined the volume-complication-mortality relationship in overall and procedure-specific analyses to study the relationship between mortality at low volume hospitals and failure-to-rescue rates. Generalized estimating equations were used in each multivariable analysis to adjust for clustering among hospitals<sup>17</sup>. All analyses were two-sided, significance was defined as  $P < 0.05$  and were performed using the R statistical package (R foundation for Statistical Computing, version 2.15.1).

## RESULTS

The baseline demographic characteristics of our cohort of patients >18 years old undergoing one of eight major cancer procedures in the United States between 1999-2009 (n=2,508,917) is shown in **Table 1**. A weighted estimate of 324,852 patients experienced  $\geq 1$ -PSI event (12.9%). Patients with  $\geq 1$ -PSI event were more likely to be older, be female, have higher CCI, participate in Medicare, have lower socioeconomic status, and be treated at lower volume non-academic hospitals when compared to patients who did not experience any hospital-acquired preventable adverse events.

The national trends in PSI rates, overall mortality rates and failure-to-rescue rates in patients undergoing major cancer surgery in the United States are depicted in **Figure 1**. While a steady increase in the frequency of PSI-events after major cancer surgery has occurred over the last 10 years (estimated annual % change-EAPC: 3.5%; 95% Confidence Interval-95% CI: 2.8% to 4.1%;  $P<0.001$ ), a concomitant decrease in failure-to-rescue rates (EAPC: -3.0%; 95% CI: -3.4% to -2.6%;  $P<0.001$ ) and overall mortality (EAPC: -2.3%; 95% CI: -2.7% to -1.9%;  $P<0.001$ ) was noted.

While there was a significant increase in overall PSI event rates over the course of the study, substantial heterogeneity was noted in terms of individual PSIs (**Figure 2**). Substantial increases were noted in the annual incidence of postoperative sepsis (EAPC: 14.1%, 95% CI: 12.0% to 16.2%;  $P<0.001$ ), pressure ulcer (EAPC: 13.4%, 95% CI: 10.2% to 16.6%;  $P<0.001$ ) and respiratory failure (EAPC: 5.6%, 95% CI: 4.8% to 6.4%;  $P<0.001$ ), while

1  
2  
3 significant advances were made in the prevention of anesthetic complications  
4 (EAPC: -17.5%, 95% CI: -27.6% to -7.5%; P=0.008), hip fractures (EAPC: -8.9%,  
5  
6 95% CI: -13.6% to -4.3%; P=0.005) and transfusion reactions (EAPC: -7.9%,  
7  
8 95% CI: -13.1% to -2.8%; P=0.001) in the perioperative period.

9  
10  
11  
12 Results of a multivariable logistic regression model predicting the odds of  $\geq 1$ -PSI  
13 event after major cancer surgery are shown in **Table 2**. These factors included:  
14  
15 female gender (vs. male, odds ratio-OR: 0.88, 95% confidence interval-CI: 0.86-  
16  
17 0.90; P<0.001), Black race (vs. Caucasians OR: 1.17, 95%CI: 1.13-1.21;  
18  
19 P<0.001), higher Charlson comorbidity index ( $\geq 3$  vs. 0, OR: 1.38, 95%CI: 1.34-  
20  
21 1.42; P<0.001), Medicaid (OR: 1.45, 95%CI: 1.39-1.52) and Medicare insurance  
22  
23 (OR: 1.16, 95%CI: 1.13-1.19; P<0.001), lower median household income (4<sup>th</sup>  
24  
25 quartile vs. 1<sup>st</sup> quartile, OR-0.92, 95%CI: 0.89-0.95; P<0.001) and surgeries at  
26  
27 lower volume hospitals (4<sup>th</sup> quartile vs. 1<sup>st</sup> quartile, OR: 0.76, 95%CI: 0.74-0.78;  
28  
29 P<0.001).

30  
31  
32  
33  
34  
35  
36  
37  
38  
39  
40  
41  
42  
43  
44  
45  
46  
47  
48  
49  
50  
51  
52  
53  
54  
55  
56  
57  
58  
59  
60  
The occurrence of  $\geq 1$ -PSI event had significant multivariable effects on specific  
outcome-level measures after major cancer surgery (**Table 3**). Patients who  
suffered from  $\geq 1$ -PSI event experienced higher rates of in-hospital mortality (OR:  
19.38, 95% CI: 18.44-20.37), prolonged length of stay (OR: 4.43, 95%CI: 4.31-  
4.54) and excessive hospital charges (OR: 5.21, 95%CI: 5.10-5.32).

We also assessed the effect of hospital volume on the incidence of PSIs and  
failure-to-rescue (**Table 4**). In the overall analysis of patients undergoing any of  
the eight procedures, very high-volume hospitals (4<sup>th</sup> quartile) had both lower PSI  
event rate *and* lower failure-to-rescue rates. However, this relationship was

1  
2  
3 procedure-specific: for colectomy, esophagectomy, lung resection,  
4  
5  
6 pancreatotomy, and prostatectomy, very high-volume hospitals had both lower  
7  
8 PSI event rates *and* lower failure-to-rescue rates. For gastrectomy, very high-  
9  
10 volume hospitals did not have lower PSI event rates but did have lower failure-to-  
11  
12 rescue rates; for hysterectomy very high-volume hospitals had *higher* PSI event  
13  
14 rates, but had lower failure-to-rescue rates; for cystectomy very high volume-  
15  
16 hospitals had lower PSI event rates and a trend toward lower failure-to-rescue  
17  
18 rates.  
19  
20  
21  
22  
23  
24  
25  
26  
27  
28  
29  
30  
31  
32  
33  
34  
35  
36  
37  
38  
39  
40  
41  
42  
43  
44  
45  
46  
47  
48  
49  
50  
51  
52  
53  
54  
55  
56  
57  
58  
59  
60



## DISCUSSION

Recently, it has been estimated that the annual cost of medical errors is over 17 billion dollars<sup>18</sup> and there have been a slew of newer initiatives over the last decade to incentivize better quality care. In 2008, Medicare announced that it would restrain the ability of hospitals to get reimbursed for 'reasonably preventable events': avoidable medical errors ranging from pressure ulcers, falls and transfusion of incompatible blood to anesthetic complications, deep vein thrombosis and foreign bodies left in the body of patients during surgery. These and other initiatives are designed to place the burden of responsibility for such hospital-acquired adverse events squarely on hospitals and physicians<sup>19</sup>. While these initiatives have been met with stiff objection from hospital administrations, the Centers for Medicaid and Medicare Services (CMS) has been consistent in its position that accountability for such events should rest with hospitals and not with the taxpayer<sup>19</sup>. The Affordable Care Act of 2010 has added newer dimensions to these quality-improvement initiatives, with reimbursement likely to be dependent on both adherence to standards of care and the perceptions of patients with regard to hospital performance as measured by surveys<sup>20</sup>.

A rational approach to improving accountability for substandard care should begin with identifying the true burden of hospital-acquired adverse events. This would be particularly useful in identifying specific adverse events that warrant special attention by payers like CMS and in preferential allocation of resources by hospitals due to the growing temporal burden of such events.

1  
2  
3 In the current study, we report contemporary trends in the frequency of hospital-  
4 acquired adverse events after major surgical oncology care in the United States.  
5  
6 Our study has a number of novel findings. First, we report a gradual increase in  
7  
8 the national frequency of hospital-acquired adverse events after major cancer  
9  
10 surgery over the last decade. This is important as it represents a decline, albeit  
11  
12 small and gradual, in the quality of surgical oncology care at the national level, as  
13  
14 measured by the primary prevention of PSI events. Second, a simultaneous  
15  
16 decrease in failure-to-rescue rates were observed and may indicate that while  
17  
18 primary prevention of hospital-acquired adverse events has deteriorated, early  
19  
20 recognition and timely management of these complications may have improved  
21  
22 in the last decade. These findings may explain the significant annual reduction in  
23  
24 mortality for patients undergoing major cancer surgery. Nonetheless, alternate  
25  
26 explanations include refinements in coding practices, which may have led to  
27  
28 better recognition and recording of non-lethal adverse events, thereby resulting in  
29  
30 an apparent decrease in mortality rates. Third, significant heterogeneity in the  
31  
32 temporal dynamics of specific hospital-acquired adverse events was noted. While  
33  
34 marked and worrisome increases were recorded in the frequency of  
35  
36 postoperative sepsis, pressure ulcers and respiratory failure, advances were  
37  
38 made in the prevention of anesthetic complications, transfusion-related  
39  
40 complications and hip fractures. Thus we identify numerous setting- and process-  
41  
42 level measures where resources need to be refocused for further improvement in  
43  
44 the quality of surgical oncology care.  
45  
46  
47  
48  
49  
50  
51  
52  
53  
54  
55  
56  
57  
58  
59  
60

1  
2  
3 We also examined the volume-complication-mortality dynamic in patients  
4 undergoing major cancer surgery, as it applies to potentially preventable hospital  
5 acquired adverse events (PSI). There is a well-established body of evidence  
6 describing the volume-mortality relationship in patients undergoing major cancer  
7 procedures and other surgeries. Dudley *et al*<sup>21</sup> examined patients undergoing  
8 one of eleven diverse procedures (ranging from coronary angioplasty to  
9 esophageal cancer surgery) in California and concluded that 602 deaths could be  
10 prevented annually by transferring patients from low-volume to high-volume  
11 hospitals. Birkmeyer *et al*<sup>22</sup> reported that Medicare patients treated at very high-  
12 volume hospitals experienced up to a 12 percent difference in absolute mortality  
13 for certain procedures relative to patients treated at very low-volume hospitals.  
14 However, the underlying mechanisms explaining the volume-mortality  
15 relationship have not been elucidated clearly. Silber *et al*<sup>23</sup> first introduced the  
16 concept of 'failure-to-rescue' in a seminal report that evaluated patients  
17 undergoing cholecystectomy or transurethral prostatectomy. They concluded that  
18 overall mortality was related to both hospital-level and patient-level factors, while  
19 adverse events were related to patient-level factors at admission (severity of  
20 illness). However, failure-to-rescue was preferentially associated with hospital-  
21 level factors and thus the underlying dynamics for failure-to-rescue were different  
22 than that for overall mortality and adverse events. The current hypothesis<sup>7</sup>  
23 regarding the volume-complication-mortality relationship is that lower volume  
24 hospitals experience higher mortality rates not because of higher complication  
25 rates, but due to lower failure-to-rescue rates. Ghaferi *et al*<sup>9</sup> demonstrated that  
26  
27  
28  
29  
30  
31  
32  
33  
34  
35  
36  
37  
38  
39  
40  
41  
42  
43  
44  
45  
46  
47  
48  
49  
50  
51  
52  
53  
54  
55  
56  
57  
58  
59  
60

1  
2  
3 high and low volume hospitals enrolled in the National Surgical Quality  
4 Improvement Program (NSQIP) had similar complication rates but different  
5  
6 failure-to-rescue rates for multiple procedures. In a subsequent analysis<sup>8</sup> of  
7  
8 patients undergoing gastrectomy, pancreatectomy or esophagectomy, similar  
9  
10 results were demonstrated. However, in the current study, very high-volume  
11  
12 hospitals (4<sup>th</sup> quartile vs. 1<sup>st</sup> quartile) had both lower PSI-event rates *and* lower  
13  
14 failure-to-rescue rates. Importantly, the volume-complication-mortality  
15  
16 relationship, as it applies to PSI events, appears to be procedure-specific and  
17  
18 heterogeneous, with the current hypothesis not accounting for multiple individual  
19  
20 major cancer surgeries, namely colectomy, esophagectomy, lung resection,  
21  
22 pancreatectomy and prostatectomy. This is an important point: CMS currently  
23  
24 focuses its quality-improvement initiatives on complication rates, and explicit  
25  
26 demonstration that lower failure-to-rescue rates and not higher complication rates  
27  
28 underlie the substandard care at low-volume hospitals may require a re-  
29  
30 consideration of these initiatives. Our findings indicate that the prevailing  
31  
32 hypothesis may need to be re-evaluated, at least for patients undergoing major  
33  
34 cancer surgery. In fact, for patients undergoing hysterectomy, this relationship is  
35  
36 reversed, with patients at very high-volume hospitals experiencing *higher* PSI  
37  
38 event rates and lower failure-to-rescue rates. The underlying reason for this  
39  
40 finding is not clear. Previous studies<sup>24</sup> have questioned the impact of hospital  
41  
42 volume on hysterectomy outcomes and have reported that surgeon volume  
43  
44 trumps hospital volume as the predominant factor underlying the volume-  
45  
46 outcomes relationship for hysterectomy. While inclusion of surgeon volume may  
47  
48  
49  
50  
51  
52  
53  
54  
55  
56  
57  
58  
59  
60

1  
2  
3 alter these findings, the higher rates of adverse events in patients undergoing  
4 hysterectomy at very high-volume hospitals may need to be re-examined in  
5  
6  
7  
8 future reports.  
9

10 Our study is not without limitations. The drawbacks of using administrative data  
11 are well known<sup>25</sup>, including limitations regarding risk-adjustment and miscoding.  
12  
13 While PSIs have been shown to perform well as screening tools from an  
14  
15 epidemiologic perspective (over-identification and few false-negatives), problems  
16  
17 related to high false-positive rates exist, with most validation studies reporting  
18  
19 positive predictive values of between 43 to >90%<sup>26 27</sup>. While it is clear that these  
20  
21 drawbacks limit the use of PSIs to make reimbursement decisions or to compare  
22  
23 hospitals, it is unclear how it affects the implications of our study, where it was  
24  
25 used as a screening tool to *identify* adverse events<sup>26 27</sup>. Secondly, morbidity and  
26  
27 mortality events in the NIS are characterized based on the index admission, and  
28  
29 subsequent readmissions, while relevant, are not recorded. This may have  
30  
31 resulted in under-recognition of the true burden of adverse events, mortality and  
32  
33 charges after the initial cancer surgery. Third: while the heterogeneity identified in  
34  
35 the volume-complication-mortality relationship is a key finding in the present  
36  
37 report, our study design does not allow for the identification of underlying  
38  
39 mechanisms explaining these results. It is also important to emphasize that, in  
40  
41 contrast to the previously cited studies where overall complication rates were  
42  
43 examined, we evaluated potentially preventable hospital acquired events only.  
44  
45  
46  
47  
48  
49  
50  
51  
52  
53  
54  
55  
56  
57  
58  
59  
60  
60 Previous investigators have shown that this restricted definition has limitations  
since not all deaths are accounted for in a given population sample<sup>28</sup>;

1  
2  
3 alternatively, these drawbacks may not apply to studies focusing on patient  
4 safety using PSI as a quality of care measure. Hence, while it may not be illogical  
5 to expect lower volume hospitals to provide substandard care secondary to both  
6 higher rates of preventable adverse events *and* higher failure-to-rescue rates, it  
7 is certainly possible that a majority of hospital-acquired complications are an  
8 inevitable result of procedure complexity and patient comorbidities (and not just a  
9 failure of setting-level prevention measures). Consequently, while more rigorous  
10 patient care pathways might explain the lower incidence of preventable adverse  
11 events and subsequent mortality in higher volume hospitals, for the majority of  
12 (non-preventable) adverse events, the incidence rates would be the same  
13 regardless of hospital volume with lower failure-to-rescue rates preferentially  
14 explaining the low mortality rates of higher volume hospitals. Further  
15 investigation of these findings is required to test these possibilities and to fully  
16 understand the underlying dynamics of the volume-mortality relationship.  
17  
18  
19  
20  
21  
22  
23  
24  
25  
26  
27  
28  
29  
30  
31  
32  
33  
34  
35  
36  
37  
38  
39  
40  
41  
42  
43  
44  
45  
46  
47  
48  
49  
50  
51  
52  
53  
54  
55  
56  
57  
58  
59  
60

## CONCLUSION

Over the past decade, there has been a substantial increase in the national frequency of potentially avoidable hospital-acquired adverse events after major cancer surgery, with a detrimental effect on numerous outcome-level measures. However, there was a concomitant reduction in failure-to-rescue rates and, consequently, overall-mortality rates. Policy changes and resource re-allocation to improve the increasing burden of specific adverse events, such as postoperative sepsis, pressure ulcer and respiratory failure, are required.

1  
2  
3 **ACKNOWLEDGEMENTS:** None  
4  
5  
6  
7

8 **COMPETING INTEREST AND FUNDING:** No potential conflicts of interest. No  
9  
10 source of financial or material support for the preparation of this manuscript. No  
11  
12 Disclaimers.  
13  
14  
15  
16  
17  
18  
19  
20  
21  
22  
23  
24  
25  
26  
27  
28  
29  
30  
31  
32  
33  
34  
35  
36  
37  
38  
39  
40  
41  
42  
43  
44  
45  
46  
47  
48  
49  
50  
51  
52  
53  
54  
55  
56  
57  
58  
59  
60



## REFERENCES

1. Iezzoni LI, Foley SM, Heeren T, Daley J, Duncan CC, Fisher ES, et al. A method for screening the quality of hospital care using administrative data: preliminary validation results. *QRB. Quality review bulletin* 1992;18(11):361-71.
2. [http://www.qualityindicators.ahrq.gov/modules/psi\\_resources.aspx](http://www.qualityindicators.ahrq.gov/modules/psi_resources.aspx) Accessed on 9/9/12.
3. Zhan C, Miller MR. Excess length of stay, charges, and mortality attributable to medical injuries during hospitalization. *JAMA : the journal of the American Medical Association* 2003;290(14):1868-74.
4. Siegel R, Naishadham D, Jemal A. Cancer statistics, 2012. *CA Cancer J Clin* 2012;62(1):10-29.
5. Ross JS, Bradley EH, Busch SH. Use of health care services by lower-income and higher-income uninsured adults. *JAMA : the journal of the American Medical Association* 2006;295(17):2027-36.
6. Liu JH, Zingmond DS, McGory ML, SooHoo NF, Ettner SL, Brook RH, et al. Disparities in the utilization of high-volume hospitals for complex surgery. *JAMA* 2006;296(16):1973-80.
7. Ghaferi AA, Dimick JB. Variation in mortality after high-risk cancer surgery: failure to rescue. *Surgical oncology clinics of North America* 2012;21(3):389-95, vii.
8. Ghaferi AA, Birkmeyer JD, Dimick JB. Hospital volume and failure to rescue with high-risk surgery. *Medical care* 2011;49(12):1076-81.
9. Ghaferi AA, Birkmeyer JD, Dimick JB. Variation in hospital mortality associated with inpatient surgery. *The New England journal of medicine* 2009;361(14):1368-75.
10. <http://www.hcup-us.ahrq.gov/nisoverview.jsp> (Accessed on 9/9/12).
11. Charlson ME, Pompei P, Ales KL, MacKenzie CR. A new method of classifying prognostic comorbidity in longitudinal studies: development and validation. *Journal of chronic diseases* 1987;40(5):373-83.
12. Deyo R, Cherkin D, Ciol M. Adapting a clinical comorbidity index for use with ICD-9-CM administrative databases. *J Clin Epidemiol* 1992;45(6):613-9.
13. United States Census Bureau. 2000 [cited 2010]; Available from: <http://www.census.gov>.
14. Trinh QD, Sun M, Sammon J, Bianchi M, Sukumar S, Ghani KR, et al. Disparities in access to care at high-volume institutions for uro-oncologic procedures. *Cancer* 2012;118(18):4421-6.
15. [http://www.qualityindicators.ahrq.gov/Modules/PSI\\_TechSpec.aspx](http://www.qualityindicators.ahrq.gov/Modules/PSI_TechSpec.aspx) (Accessed on 9/9/12).
16. Anderson WF, Camargo MC, Fraumeni JF, Jr., Correa P, Rosenberg PS, Rabkin CS. Age-specific trends in incidence of noncardia gastric cancer in US adults. *JAMA : the journal of the American Medical Association* 2010;303(17):1723-8.

17. Panageas KS, Schrag D, Riedel E, Bach PB, Begg CB. The effect of clustering of outcomes on the association of procedure volume and surgical outcomes. *Annals of internal medicine* 2003;139(8):658-65.
18. Van Den Bos J, Rustagi K, Gray T, Halford M, Ziemkiewicz E, Shreve J. The \$17.1 billion problem: the annual cost of measurable medical errors. *Health affairs (Project Hope)* 2011;30(4):596-603.
19. Milstein A. Ending extra payment for "never events"--stronger incentives for patients' safety. *The New England journal of medicine* 2009;360(23):2388-90.
20. <http://patients.about.com/od/AffordableCareAct/a/Affordable-Care-Act-And-Patient-Satisfaction-In-Hospitals.htm> Accessed on 9/9/12.
21. Dudley RA, Johansen KL, Brand R, Rennie DJ, Milstein A. Selective referral to high-volume hospitals: estimating potentially avoidable deaths. *JAMA* 2000;283(9):1159-66.
22. Birkmeyer JD, Siewers AE, Finlayson EV, Stukel TA, Lucas FL, Batista I, et al. Hospital volume and surgical mortality in the United States. *The New England journal of medicine* 2002;346(15):1128-37.
23. Silber JH, Williams SV, Krakauer H, Schwartz JS. Hospital and patient characteristics associated with death after surgery. A study of adverse occurrence and failure to rescue. *Medical care* 1992;30(7):615-29.
24. Wright JD, Lewin SN, Deutsch I, Burke WM, Sun X, Herzog TJ. Effect of surgical volume on morbidity and mortality of abdominal hysterectomy for endometrial cancer. *Obstetrics and gynecology* 2011;117(5):1051-9.
25. Sarrazin MS, Rosenthal GE. Finding pure and simple truths with administrative data. *JAMA : the journal of the American Medical Association* 2012;307(13):1433-5.
26. Henderson KE, Recktenwald A, Reichley RM, Bailey TC, Waterman BM, Diekemper RL, et al. Clinical validation of the AHRQ postoperative venous thromboembolism patient safety indicator. *Joint Commission journal on quality and patient safety / Joint Commission Resources* 2009;35(7):370-6.
27. Kaafarani HM, Borzecki AM, Itani KM, Loveland S, Mull HJ, Hickson K, et al. Validity of selected Patient Safety Indicators: opportunities and concerns. *Journal of the American College of Surgeons* 2011;212(6):924-34.
28. Silber JH, Romano PS, Rosen AK, Wang Y, Even-Shoshan O, Volpp KG. Failure-to-rescue: comparing definitions to measure quality of care. *Medical care* 2007;45(10):918-25.

## FIGURE LEGENDS

**FIGURE 1.** National trends in Patient Safety Indicator (PSI) rates, overall mortality rates and failure-to-rescue rates in patients undergoing major cancer surgery (MCS) in the United States (1999-2009); EAPC-Estimated Annual Percent Change

**FIGURE 2.** National trends in individual Patient Safety Indicators over the study period (1999-2009) in patients undergoing major cancer surgery (MCS) in the United States

**Table 1.** Baseline characteristics of patients > 18 years undergoing major cancer surgery, Nationwide Inpatient Sample, 1999-2009.

| Variables                                  | Baseline characteristics |                       |                    |                     |
|--------------------------------------------|--------------------------|-----------------------|--------------------|---------------------|
|                                            | Overall (%)              | Without PSI event (%) | With PSI event (%) | P                   |
| <b>Weighted number of patients</b>         | 2508917                  | 2184065 (87.1)        | 324852 (12.9)      | –                   |
| <b>Age (years)</b>                         |                          |                       |                    |                     |
| Mean (SD)                                  | 65.9 (11.7)              | 65.4 (11.6)           | 69.5 (11.7)        | <0.001 <sup>2</sup> |
| Median (IQR)                               | 66 (58,74)               | 65 (57,73)            | 71 (62,78)         |                     |
| <b>Gender</b>                              |                          |                       |                    |                     |
| Male                                       | 1511361 (60.3)           | 1331716 (61.1)        | 179645 (55.3)      | <0.001              |
| Female                                     | 993704 (39.7)            | 848527 (38.9)         | 145177 (44.7)      |                     |
| <b>Race</b>                                |                          |                       |                    |                     |
| Caucasian                                  | 1525021 (60.8)           | 1324373 (60.6)        | 200648 (61.8)      | <0.001              |
| Black                                      | 177986 (7.1)             | 154028 (7.1)          | 23958 (7.4)        |                     |
| Hispanic                                   | 98532 (3.9)              | 86128 (3.9)           | 12404 (3.8)        |                     |
| Other                                      | 93041 (3.7)              | 81492 (3.6)           | 11549 (3.6)        |                     |
| Unknown                                    | 614337 (24.5)            | 76293 (23.5)          | 76293 (23.5)       |                     |
| <b>CCI</b>                                 |                          |                       |                    |                     |
| 0                                          | 1566723 (62.4)           | 1412545 (64.7)        | 154178 (47.5)      | <0.001              |
| 1                                          | 623985 (24.9)            | 516640 (23.7)         | 107345 (33.0)      |                     |
| 2                                          | 127538 (5.1)             | 102276 (4.7)          | 25262 (7.8)        |                     |
| ≥3                                         | 190670 (7.6)             | 152603 (7.0)          | 38067 (11.7)       |                     |
| <b>Insurance status</b>                    |                          |                       |                    |                     |
| Private                                    | 1057919 (42.2)           | 968015 (44.3)         | 89904 (27.7)       | <0.001              |
| Medicaid                                   | 80666 (3.2)              | 66947 (3.1)           | 13719 (4.2)        |                     |
| Medicare                                   | 1265920 (50.5)           | 1056618 (48.4)        | 209302 (64.4)      |                     |
| Other                                      | 104412 (4.2)             | 92485 (4.2)           | 11927 (3.7)        |                     |
| <b>Median household income by ZIP code</b> |                          |                       |                    |                     |
| 1-24,999                                   | 369796 (14.7)            | 313652 (14.4)         | 56144 (17.3)       | <0.001              |
| 25,000-34,999                              | 596202 (23.8)            | 513758 (23.5)         | 82444 (25.4)       |                     |
| 35,000-44,999                              | 646869 (25.8)            | 563398 (25.8)         | 83471 (25.7)       |                     |
| 45,000+                                    | 842375 (33.6)            | 746499 (34.2)         | 95876 (29.5)       |                     |
| Unknown                                    | 53672 (2.1)              | 46757 (2.1)           | 6915 (2.1)         |                     |
| <b>Annual hospital volume</b>              |                          |                       |                    |                     |
| 1st quartile                               | 591675 (23.6)            | 510024 (23.4)         | 81651 (25.1)       | <0.001              |
| 2nd quartile                               | 640229 (25.5)            | 551980 (25.3)         | 88249 (27.2)       |                     |
| 3rd quartile                               | 636482 (25.4)            | 554325 (25.4)         | 82157 (25.3)       |                     |
| 4th quartile                               | 640531 (25.5)            | 567737 (26.0)         | 72794 (22.4)       |                     |
| <b>Hospital location</b>                   |                          |                       |                    |                     |
| Rural                                      | 268349 (10.7)            | 235606 (10.8)         | 32743 (10.1)       | <0.001              |
| Urban                                      | 2239651 (89.3)           | 1947705 (89.2)        | 291946 (89.9)      |                     |
| <b>Hospital region</b>                     |                          |                       |                    |                     |
| Northeast                                  | 526593 (21.)             | 458684 (21.0)         | 67909 (20.9)       | <0.001              |
| Midwest                                    | 608988 (24.3)            | 532951 (24.4)         | 76037 (23.4)       |                     |
| South                                      | 8822566 (35.2)           | 762212 (34.9)         | 120354 (37.0)      |                     |
| West                                       | 490770 (19.6)            | 430218 (19.7)         | 60552 (18.6)       |                     |
| <b>Hospital teaching status</b>            |                          |                       |                    |                     |
| Non-teaching                               | 1135065 (45.3)           | 979636 (44.9)         | 155429 (47.9)      | <0.001              |
| Teaching                                   | 1372935 (54.7)           | 1203675 (55.1)        | 169260 (52.1)      |                     |

<sup>1</sup> Multivariable logistic regression analysis adjusted for hospital clustering by generalized estimating equations<sup>2</sup> Mann-Whitney test was performed.

**Table 2.** Multivariable logistic regression predicting occurrence of at least 1 patient safety indicator event

| Variables                                  | Multivariable predictors of $\geq 1$ PSI event <sup>1</sup> |        |
|--------------------------------------------|-------------------------------------------------------------|--------|
|                                            | OR (95% CI)                                                 | P      |
| <b>Weighted number of patients</b>         |                                                             |        |
| <b>Age (years)</b>                         | 1.018 (1.017 - 1.019)                                       | <0.001 |
| <b>Gender</b>                              |                                                             |        |
| Male                                       | 1.0 (ref.)                                                  | –      |
| Female                                     | 0.878 (0.862 - 0.895)                                       | <0.001 |
| <b>Race</b>                                |                                                             |        |
| Caucasian                                  | 1.0 (ref.)                                                  | –      |
| Black                                      | 1.172 (1.132 - 1.213)                                       | <0.001 |
| Hispanic                                   | 0.973 (0.930 - 1.019)                                       | 0.245  |
| Other                                      | 0.938 (0.895 - 0.983)                                       | 0.008  |
| Unknown                                    | 1.010 (0.988 - 1.033)                                       | 0.366  |
| <b>CCI</b>                                 |                                                             |        |
| 0                                          | 1.0 (ref.)                                                  | –      |
| 1                                          | 1.227 (1.203 - 1.252)                                       | <0.001 |
| 2                                          | 1.188 (1.147 - 1.230)                                       | <0.001 |
| $\geq 3$                                   | 1.377 (1.336 - 1.419)                                       | <0.001 |
| <b>Insurance status</b>                    |                                                             |        |
| Private                                    | 1.0 (ref.)                                                  | –      |
| Medicaid                                   | 1.454 (1.388 - 1.523)                                       | <0.001 |
| Medicare                                   | 1.155 (1.127 - 1.185)                                       | <0.001 |
| Other                                      | 1.127 (1.075 - 1.181)                                       | <0.001 |
| <b>Median household income by ZIP code</b> |                                                             |        |
| 1-24,999                                   | 1.0 (ref.)                                                  | –      |
| 25,000-34,999                              | 0.986 (0.959 - 1.013)                                       | 0.305  |
| 35,000-44,999                              | 0.960 (0.934 - 0.987)                                       | 0.004  |
| 45,000+                                    | 0.920 (0.894 - 0.946)                                       | <0.001 |
| Unknown                                    | 1.003 (0.943 - 1.067)                                       | 0.929  |
| <b>Annual hospital volume</b>              |                                                             |        |
| 1st quartile                               | 1.0 (ref.)                                                  | –      |
| 2nd quartile                               | 0.945 (0.922 - 0.969)                                       | <0.001 |
| 3rd quartile                               | 0.883 (0.860 - 0.907)                                       | <0.001 |
| 4th quartile                               | 0.761 (0.739 - 0.783)                                       | <0.001 |
| <b>Hospital location</b>                   |                                                             |        |
| Rural                                      | 1.0 (ref.)                                                  | –      |
| Urban                                      | 1.236 (1.198 - 1.275)                                       | <0.001 |
| <b>Hospital region</b>                     |                                                             |        |
| Northeast                                  | 1.0 (ref.)                                                  | –      |
| Midwest                                    | 0.991 (0.964 - 1.019)                                       | 0.541  |
| South                                      | 1.049 (1.024 - 1.075)                                       | <0.001 |
| West                                       | 1.018 (0.989 - 1.047)                                       | 0.229  |
| <b>Hospital teaching status</b>            |                                                             |        |
| Non-teaching                               | 1.0 (ref.)                                                  | –      |
| Teaching                                   | 0.972 (0.952 - 0.992)                                       | 0.007  |

<sup>1</sup>Other predictors included procedure type [colectomy-ref; cystectomy (OR: 1.51, 95%CI: 1.45-1.57), esophagectomy(OR:5.16, 95%CI:4.81-5.54), gastrectomy(OR:2.01, 95%CI:1.93-2.09), hysterectomy(OR:0.56, 95%CI:0.54-0.58), lung resection(OR:2.44, 95%CI:2.39-2.50), pancreatectomy(OR:1.79, 95%CI:1.71-1.88),prostatectomy(OR:0.26, 95%CI:0.25-0.27)] and year of surgery (OR: 1.037, 95%CI: 1.034-1.040). All P<0.001. OR-Odds ratio. CI: confidence interval

**Table 3.** Multivariable effects of  $\geq 1$  Patient safety indicator events on in-hospital mortality, prolonged length of stay and excessive hospital charges in patients undergoing major cancer surgery in the United States between 1999-2009.

| Variables                             | $\geq 1$ Patient safety indicator vs. no PSI |        |
|---------------------------------------|----------------------------------------------|--------|
|                                       | OR (95% CI)**                                | P      |
| In-hospital mortality (n=51312)*      | 19.380 (18.439 - 20.368)                     | <0.001 |
| Prolonged length of stay (n=888220)   | 4.426 (4.313 - 4.542)                        | <0.001 |
| Excessive hospital charges (n=609128) | 5.207 (5.097 - 5.319)                        | <0.001 |

\* 1457 patients with missing in-hospital mortality data.

\*\* Each of these effects was derived from individual multivariable logistic regression models adjusted for hospital clustering, procedure type, age, gender, race, CCI, insurance status, socioeconomic status, year of admission, hospital location, hospital region, hospital volume quartiles and institutional academic status.

**Legend.** OR: odds ratio, CI: confidence interval, PSI: patient safety indicator; CCI: Charlson comorbidity index.

**Table 4.** Impact of hospital volume effect on patient safety indicator event occurrence and on failure to rescue (death after patient safety indicator event) from individual multivariable logistic regression models adjusted for hospital clustering by generalized estimating equation in patients undergoing major cancer surgery, Nationwide Inpatient Sample, 1999-2009.

| Procedure                       | Patient safety indicator occurrence |         | Failure to rescue     |         |
|---------------------------------|-------------------------------------|---------|-----------------------|---------|
|                                 | OR (95% CI)                         | P-value | OR (95% CI)           | P-value |
| <b>Overall</b>                  |                                     |         |                       |         |
| 1 <sup>st</sup> volume quartile | 1.0 (ref.)                          | -       | 1.0 (ref.)            | -       |
| 2 <sup>nd</sup> volume quartile | 0.945 (0.922 - 0.969)               | <0.001  | 0.920 (0.861 - 0.982) | 0.013   |
| 3 <sup>rd</sup> volume quartile | 0.883 (0.860 - 0.907)               | <0.001  | 0.842 (0.784 - 0.904) | <0.001  |
| 4 <sup>th</sup> volume quartile | 0.761 (0.739 - 0.783)               | <0.001  | 0.716 (0.661 - 0.775) | <0.001  |
| <b>Colectomy</b>                |                                     |         |                       |         |
| 1 <sup>st</sup> volume quartile | 1.0 (ref.)                          | -       | 1.0 (ref.)            | -       |
| 2 <sup>nd</sup> volume quartile | 1.007 (0.969 - 1.046)               | 0.728   | 1.029 (0.936 - 1.132) | 0.553   |
| 3 <sup>rd</sup> volume quartile | 0.940 (0.902 - 0.980)               | 0.003   | 0.978 (0.883 - 1.083) | 0.670   |
| 4 <sup>th</sup> volume quartile | 0.842 (0.805 - 0.881)               | <0.001  | 0.831 (0.742 - 0.931) | 0.001   |
| <b>Cystectomy</b>               |                                     |         |                       |         |
| 1 <sup>st</sup> volume quartile | 1.0 (ref.)                          | -       | 1.0 (ref.)            | -       |
| 2 <sup>nd</sup> volume quartile | 0.816 (0.728 - 0.914)               | <0.001  | 0.872 (0.642 - 1.185) | 0.382   |
| 3 <sup>rd</sup> volume quartile | 0.760 (0.672 - 0.860)               | <0.001  | 0.691 (0.487 - 0.981) | 0.039   |
| 4 <sup>th</sup> volume quartile | 0.585 (0.509 - 0.671)               | <0.001  | 0.706 (0.471 - 1.058) | 0.092   |
| <b>Esophagectomy</b>            |                                     |         |                       |         |
| 1 <sup>st</sup> volume quartile | 1.0 (ref.)                          | -       | 1.0 (ref.)            | -       |
| 2 <sup>nd</sup> volume quartile | 0.802 (0.653 - 0.986)               | 0.037   | 0.633 (0.432 - 0.928) | 0.019   |
| 3 <sup>rd</sup> volume quartile | 0.687 (0.546 - 0.863)               | 0.001   | 0.488 (0.309 - 0.770) | 0.002   |
| 4 <sup>th</sup> volume quartile | 0.479 (0.378 - 0.609)               | <0.001  | 0.459 (0.280 - 0.753) | 0.002   |
| <b>Gastrectomy</b>              |                                     |         |                       |         |
| 1 <sup>st</sup> volume quartile | 1.0 (ref.)                          | -       | 1.0 (ref.)            | -       |
| 2 <sup>nd</sup> volume quartile | 1.043 (0.935 - 1.163)               | 0.455   | 1.028 (0.820 - 1.289) | 0.812   |
| 3 <sup>rd</sup> volume quartile | 0.973 (0.866 - 1.093)               | 0.642   | 0.847 (0.660 - 1.088) | 0.193   |
| 4 <sup>th</sup> volume quartile | 0.905 (0.795 - 1.030)               | 0.129   | 0.709 (0.532 - 0.945) | 0.019   |
| <b>Hysterectomy</b>             |                                     |         |                       |         |
| 1 <sup>st</sup> volume quartile | 1.0 (ref.)                          | -       | 1.0 (ref.)            | -       |
| 2 <sup>nd</sup> volume quartile | 1.044 (0.930 - 1.172)               | 0.468   | 0.955 (0.895 - 1.020) | 0.168   |
| 3 <sup>rd</sup> volume quartile | 1.264 (1.118 - 1.428)               | <0.001  | 0.874 (0.815 - 0.938) | <0.001  |
| 4 <sup>th</sup> volume quartile | 1.231 (1.083 - 1.399)               | 0.001   | 0.758 (0.701 - 0.820) | <0.001  |
| <b>Lung</b>                     |                                     |         |                       |         |
| 1 <sup>st</sup> volume quartile | 1.0 (ref.)                          | -       | 1.0 (ref.)            | -       |
| 2 <sup>nd</sup> volume quartile | 0.954 (0.911 - 1.000)               | 0.048   | 0.820 (0.720 - 0.934) | 0.003   |
| 3 <sup>rd</sup> volume quartile | 0.910 (0.866 - 0.956)               | <0.001  | 0.755 (0.657 - 0.867) | <0.001  |
| 4 <sup>th</sup> volume quartile | 0.792 (0.750 - 0.836)               | <0.001  | 0.643 (0.548 - 0.753) | <0.001  |
| <b>Pancreatectomy</b>           |                                     |         |                       |         |
| 1 <sup>st</sup> volume quartile | 1.0 (ref.)                          | -       | 1.0 (ref.)            | -       |
| 2 <sup>nd</sup> volume quartile | 0.767 (0.676 - 0.870)               | <0.001  | 0.598 (0.460 - 0.775) | <0.001  |
| 3 <sup>rd</sup> volume quartile | 0.539 (0.468 - 0.621)               | <0.001  | 0.405 (0.291 - 0.564) | <0.001  |
| 4 <sup>th</sup> volume quartile | 0.416 (0.357 - 0.485)               | <0.001  | 0.362 (0.250 - 0.525) | <0.001  |
| <b>Prostatectomy</b>            |                                     |         |                       |         |
| 1 <sup>st</sup> volume quartile | 1.0 (ref.)                          | -       | 1.0 (ref.)            | -       |
| 2 <sup>nd</sup> volume quartile | 0.772 (0.713 - 0.837)               | <0.001  | 1.293 (0.696 - 2.403) | 0.415   |
| 3 <sup>rd</sup> volume quartile | 0.736 (0.673 - 0.805)               | <0.001  | 1.335 (0.687 - 2.591) | 0.394   |
| 4 <sup>th</sup> volume quartile | 0.541 (0.488 - 0.600)               | <0.001  | 0.293 (0.085 - 1.006) | 0.051   |

<sup>1</sup>Multivariable models were generated for the overall model and for each procedure individually. Only the odds ratio (OR) and 95% confidence intervals (CI) for hospital volume are displayed in the table. Other covariates in each model included: age, gender, race, comorbidities, median household income by ZIP code, hospital location, teaching status, region, year of admission and procedure type (for overall model only)

| Patient Safety Indicator                                                                         | ICD-9-CM                                                                                                        |
|--------------------------------------------------------------------------------------------------|-----------------------------------------------------------------------------------------------------------------|
| Anesthetic Complications                                                                         | E8763, E9381, E9382, E9383, E9384, E9385, E9386, E9387, E9389, 9681, 9682, 9683, 9684, 9687, E8551              |
| Pressure Ulcers                                                                                  | 7072X, 7070, 70700, 70701, 70702, 70703, 70704, 70705, 70706, 70707, 70709                                      |
| Foreign Body                                                                                     | 9984, 9987, E871X                                                                                               |
| Iatrogenic Pneumothorax                                                                          | 5121                                                                                                            |
| Central Venous Catheter-Related Blood Stream Infection                                           | 99662, 9993, 99931, 99932                                                                                       |
| Postoperative Hip Fracture                                                                       | 820XX                                                                                                           |
| Postoperative Hemorrhage or Hematoma                                                             | 9981X, 388X, 3941, 3998, 4995, 5793, 6094, 1809, 540, 5412, 6094, 5919, 610, 6998, 7014, 7109, 7591, 7592, 8604 |
| Postoperative Physiologic and Metabolic Derangement (Secondary Diabetes or Acute Kidney Failure) | 249XX, 2501X, 2502X, 2503X, 584X, 586, 9975                                                                     |
| Postoperative Physiologic and Metabolic Derangement (Dialysis)                                   | 3995, 5498                                                                                                      |
| Postoperative Respiratory Failure                                                                | 5185X, 51881, 51884, 9672, 9670, 9671, 9604                                                                     |
| Postoperative Deep Vein Thrombosis or Pulmonary Embolus                                          | 4511X, 4512, 45181, 4519, 4534X, 4538, 4539, 4151X                                                              |
| Postoperative Sepsis                                                                             | 038X, 038XX, 9980X, 9959X                                                                                       |
| Postoperative Wound Dehiscence                                                                   | 5461                                                                                                            |
| Accidental Puncture or Laceration                                                                | E870X, 9982                                                                                                     |
| Transfusion Reaction                                                                             | 9996X, 9997X, E8760                                                                                             |



1  
2  
3  
4  
5  
6  
7  
8  
9  
10  
11  
12  
13  
14  
15  
16  
17  
18  
19  
20  
21  
22  
23  
24  
25  
26  
27  
28  
29  
30  
31  
32  
33  
34  
35  
36  
37  
38  
39  
40  
41  
42  
43  
44  
45  
46  
47  
48  
49  
50  
51  
52  
53  
54  
55  
56  
57  
58  
59  
60

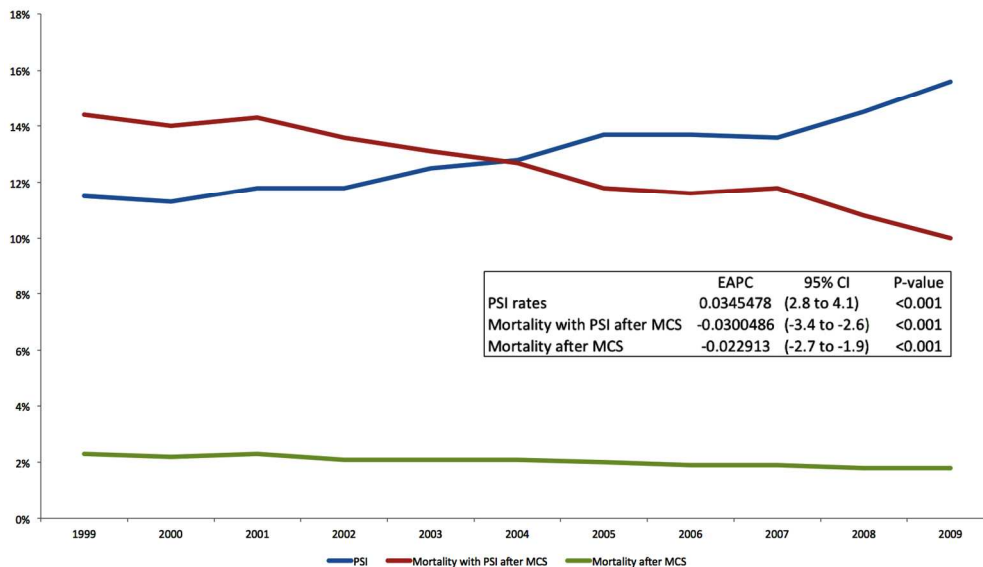

602x346mm (72 x 72 DPI)

review only

1  
2  
3  
4  
5  
6  
7  
8  
9  
10  
11  
12  
13  
14  
15  
16  
17  
18  
19  
20  
21  
22  
23  
24  
25  
26  
27  
28  
29  
30  
31  
32  
33  
34  
35  
36  
37  
38  
39  
40  
41  
42  
43  
44  
45  
46  
47  
48  
49  
50  
51  
52  
53  
54  
55  
56  
57  
58  
59  
60

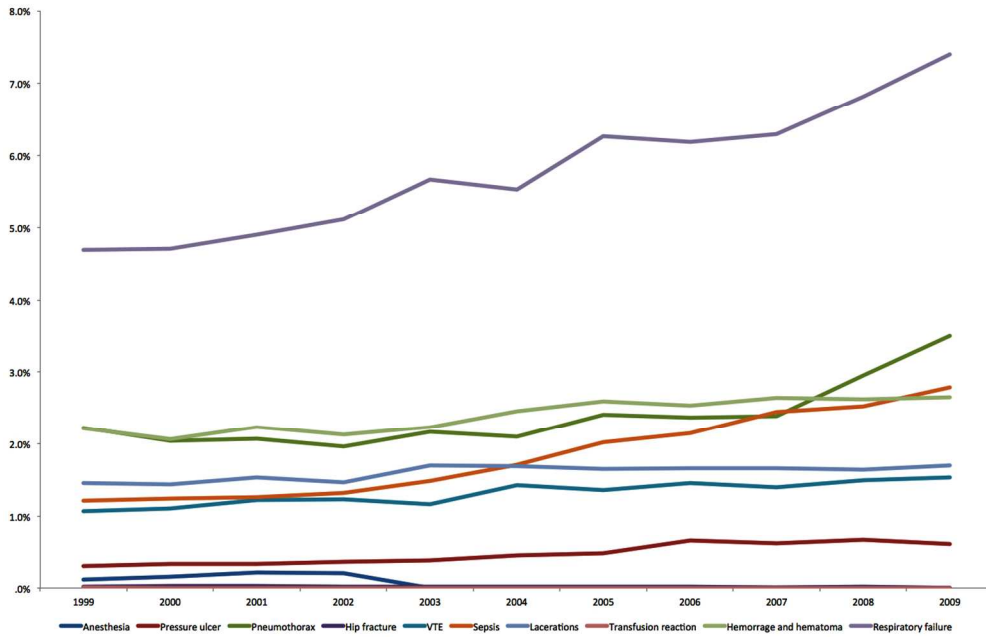

503x323mm (72 x 72 DPI)

Review only



**NATIONAL TRENDS IN HOSPITAL-ACQUIRED PREVENTABLE  
ADVERSE EVENTS AFTER MAJOR CANCER SURGERY IN THE  
UNITED STATES**

|                                 |                                                                                                                                                                                                                                                                                                                                                                                                                                                                                                                                                                                                                                                                                                                                                                                                                                                                                                                                                                                                                                                                                                                                                                                                                                                                                                                                                                                                                                                                                                                           |
|---------------------------------|---------------------------------------------------------------------------------------------------------------------------------------------------------------------------------------------------------------------------------------------------------------------------------------------------------------------------------------------------------------------------------------------------------------------------------------------------------------------------------------------------------------------------------------------------------------------------------------------------------------------------------------------------------------------------------------------------------------------------------------------------------------------------------------------------------------------------------------------------------------------------------------------------------------------------------------------------------------------------------------------------------------------------------------------------------------------------------------------------------------------------------------------------------------------------------------------------------------------------------------------------------------------------------------------------------------------------------------------------------------------------------------------------------------------------------------------------------------------------------------------------------------------------|
| Journal:                        | <i>BMJ Open</i>                                                                                                                                                                                                                                                                                                                                                                                                                                                                                                                                                                                                                                                                                                                                                                                                                                                                                                                                                                                                                                                                                                                                                                                                                                                                                                                                                                                                                                                                                                           |
| Manuscript ID:                  | bmjopen-2013-002843.R1                                                                                                                                                                                                                                                                                                                                                                                                                                                                                                                                                                                                                                                                                                                                                                                                                                                                                                                                                                                                                                                                                                                                                                                                                                                                                                                                                                                                                                                                                                    |
| Article Type:                   | Research                                                                                                                                                                                                                                                                                                                                                                                                                                                                                                                                                                                                                                                                                                                                                                                                                                                                                                                                                                                                                                                                                                                                                                                                                                                                                                                                                                                                                                                                                                                  |
| Date Submitted by the Author:   | 17-May-2013                                                                                                                                                                                                                                                                                                                                                                                                                                                                                                                                                                                                                                                                                                                                                                                                                                                                                                                                                                                                                                                                                                                                                                                                                                                                                                                                                                                                                                                                                                               |
| Complete List of Authors:       | Sukumar, Shyam; Henry Ford Health System, Center for Outcomes Research and Analytics<br>Roghmann, Florian; University of Montreal Health Center, Cancer Prognostics and Health Outcomes Unit; Ruhr University Bochum, Marienhospital, Department of Urology<br>Trinh, Vincent; University of Montreal Health Center, Cancer Prognostics and Health Outcomes Unit<br>Sammon, Jesse; Henry Ford Health System, Center for Outcomes Research and Analytics<br>Gervais, Mai-Kim; University of Montreal Health Center, Division of General Surgery<br>Tan, Hung-Jui; Dow Division of Health Services Research, University of Michigan<br>Ravi, Praful; Henry Ford Health System, Center for Outcomes Research and Analytics<br>Kim, Simon; Mayo Clinic, Rochester, Department of Urology<br>Hu, Jim; David Geffen School of Medicine, University of California, Los Angeles, Department of Urology<br>Karakiewicz, Pierre; University of Montreal Health Center, Cancer Prognostics and Health Outcomes Unit<br>Noldus, Joachim; Ruhr University Bochum, Marienhospital, Department of Urology<br>Sun, Maxine; University of Montreal Health Center, Cancer Prognostics and Health Outcomes Unit<br>Menon, Mani; Henry Ford Health System, Center for Outcomes Research and Analytics<br>Trinh, Quoc-Dien; University of Montreal Health Center, Cancer Prognostics and Health Outcomes Unit; Brigham and Women's Hospital / Dana-Farber Cancer Institute, Harvard Medical School, Department of Surgery, Division of Urology |
| <b>Primary Subject Heading</b>: | Epidemiology                                                                                                                                                                                                                                                                                                                                                                                                                                                                                                                                                                                                                                                                                                                                                                                                                                                                                                                                                                                                                                                                                                                                                                                                                                                                                                                                                                                                                                                                                                              |
| Secondary Subject Heading:      | Surgery, Oncology, Health services research                                                                                                                                                                                                                                                                                                                                                                                                                                                                                                                                                                                                                                                                                                                                                                                                                                                                                                                                                                                                                                                                                                                                                                                                                                                                                                                                                                                                                                                                               |
| Keywords:                       | Quality in health care < HEALTH SERVICES ADMINISTRATION & MANAGEMENT, Patient Safety Indicators, Cancer surgery, Preventable Adverse Events, Patient Safety Indicators, Quality Improvement                                                                                                                                                                                                                                                                                                                                                                                                                                                                                                                                                                                                                                                                                                                                                                                                                                                                                                                                                                                                                                                                                                                                                                                                                                                                                                                               |

1  
2  
3  
4  
5  
6  
7  
8  
9  
10  
11  
12  
13  
14  
15  
16  
17  
18  
19  
20  
21  
22  
23  
24  
25  
26  
27  
28  
29  
30  
31  
32  
33  
34  
35  
36  
37  
38  
39  
40  
41  
42  
43  
44  
45  
46  
47  
48  
49  
50  
51  
52  
53  
54  
55  
56  
57  
58  
59  
60

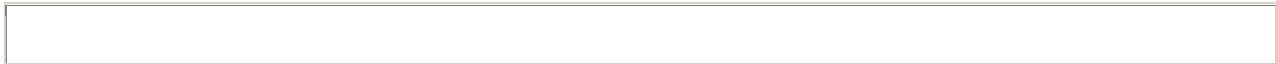

SCHOLARONE™  
Manuscripts

For peer review only

# NATIONAL TRENDS IN HOSPITAL-ACQUIRED PREVENTABLE ADVERSE EVENTS AFTER MAJOR CANCER SURGERY IN THE UNITED STATES

Shyam Sukumar<sup>1\*</sup>, Florian Roghmann<sup>2, 3\*</sup>, Vincent Q. Trinh<sup>2</sup>, Jesse D. Sammon<sup>1</sup>, Mai-Kim Gervais<sup>4</sup>, Hung-Jui Tan<sup>5</sup>, Praful Ravi<sup>1</sup>, Simon P. Kim<sup>6</sup>, Jim C. Hu<sup>7</sup>, Pierre I. Karakiewicz<sup>2</sup>, Joachim Noldus<sup>3</sup>, Maxine Sun<sup>2</sup>, Mani Menon<sup>1</sup>, Quoc-Dien Trinh<sup>2,8</sup>

\*Denotes equal contribution

<sup>1</sup>Center for Outcomes Research and Analytics, Henry Ford Health System, Detroit, MI, USA

<sup>2</sup>Cancer Prognostics and Health Outcomes Unit, University of Montreal Health Center, Montreal, Canada

<sup>3</sup>Department of Urology, Ruhr University Bochum, Marienhospital, Herne, Germany

<sup>4</sup>Division of General Surgery, University of Montreal Health Center, Montreal, Canada

<sup>5</sup>Dow Division of Health Services Research, University of Michigan, Ann Arbor, MI, USA

<sup>6</sup>Department of Urology, Mayo Clinic, Rochester, MN, USA

<sup>7</sup>Department of Urology, David Geffen School of Medicine, University of California, Los Angeles, Los Angeles, CA, USA

<sup>8</sup>Department of Surgery, Division of Urology, Brigham and Women's Hospital / Dana-Farber Cancer Institute, Harvard Medical School, Boston, MA

## **Address all correspondence to:**

Florian Roghmann, MD  
Cancer Prognostics and Health Outcomes Unit  
264 blvd. Rene-Levesque E. suite 228  
Montreal, QC, H2X 1P1, Canada  
Tel: 514-890-8000 ext: 35335  
Fax: 514-227-5103  
Email: [f.roghmann@gmail.com](mailto:f.roghmann@gmail.com)

**Word count:** abstract (272), manuscript (2981, excluding title page, abstract, references, figures, figure legends and tables), 25 pages, 28 references, 4 tables, 4 figures, 1 appendix

**Keywords:** Patient Safety Indicators; Preventable Adverse Events; Surgery; Quality of Care; Cancer surgery; Quality Improvement; Hospital Acquired Adverse Events

**Running Head:** Preventable Adverse Events after Cancer Surgery

## ABSTRACT

**Objectives:** While multiple studies have demonstrated variations in the quality of cancer-care in the U.S., payers are increasingly assessing structure-and process-level measures to promote quality improvement. Hospital-acquired-adverse events are one such measure and we examine their national trends after major cancer surgery.

**Design:** Retrospective, cross-sectional analysis of a weighted-national estimate from the Nationwide Inpatient Sample undergoing major oncological procedures (colectomy, cystectomy, esophagectomy, gastrectomy, hysterectomy, lung resection, pancreatectomy and prostatectomy). The Agency for Healthcare Research and Quality Patient Safety Indicators (PSIs) were utilized to identify trends in hospital-acquired-adverse events.

**Setting:** Secondary and tertiary care, U.S. hospitals in the Nationwide Inpatient Sample (NIS)

**Participants:** A weighted-national estimate of 2,508,917 patients (>18 years, 1999-2009) from the NIS.

**Primary outcome measures:** Hospital-acquired-adverse events.

**Results:** 324,852 patients experienced  $\geq 1$ -PSI event (12.9%). Patients with  $\geq 1$ -PSI experienced higher-rates of in-hospital mortality (OR: 19.38, 95% CI: 18.44-20.37), prolonged length-of-stay (OR: 4.43, 95%CI: 4.31-4.54) and excessive hospital-charges (OR: 5.21, 95%CI: 5.10-5.32). Patients treated at lower-volume hospitals experienced both higher PSI-events *and* failure-to-rescue rates. While a steady increase in the frequency of PSI-events after major cancer surgery has

1  
2  
3 occurred over the last 10 years (estimated annual % change-EAPC: 3.5%,  
4  
5 p<0.001), a concomitant decrease in failure-to-rescue rates (EAPC: -3.01%) and  
6  
7 overall mortality (EAPC: -2.30%) was noted. (All p<0.001)  
8  
9

10 **Conclusions:** Over the past decade, there has been a substantial increase in  
11  
12 the national frequency of potentially avoidable adverse-events after major cancer  
13  
14 surgery, with a detrimental effect on numerous outcome-level measures.  
15  
16 However, there was a concomitant reduction in failure-to-rescue rates and  
17  
18 overall-mortality rates. Policy changes to improve the increasing burden of  
19  
20 specific adverse events, such as postoperative sepsis, pressure ulcers and  
21  
22 respiratory failure, are required.  
23  
24  
25  
26  
27  
28  
29  
30  
31  
32  
33  
34  
35  
36  
37  
38  
39  
40  
41  
42  
43  
44  
45  
46  
47  
48  
49  
50  
51  
52  
53  
54  
55  
56  
57  
58  
59  
60

## Article summary

### Article focus

- Variations in the quality of surgical oncology care in the U.S. remain unclear.
- Payers are increasingly assessing structure-and process-level measures to promote quality improvement.
- Hospital-acquired-adverse events are one such measure and we examine their national trends after major cancer surgery.

### Key messages

- Over the past decade, there has been a substantial increase in the national frequency of potentially avoidable adverse-events after major cancer surgery but there was also a concomitant reduction in failure-to-rescue rates and overall-mortality rates.
- Patients treated at lower-volume hospitals experienced both higher frequency of potentially avoidable adverse-events *and* failure-to-rescue rates.
- Policy changes to improve the increasing burden of specific adverse events, such as postoperative sepsis, pressure ulcers and respiratory failure, are required.

### Strength and limitations of this study



- This is the largest study to assess the quality of oncologic surgical care in a nationally representative cohort of U.S. patients.
- Validated Agency for Healthcare Research and Quality Patient Safety Indicators (PSIs) were utilized to identify trends in hospital-acquired-adverse events.
- Inherent to retrospective analyses of large administrative datasets, this study is limited by potential biases due to case-mix and miscoding.
- While PSIs have been shown to perform well as screening tools from an epidemiologic perspective (over-identification and few false-negatives), concerns related to high false-positive rates exist.

## INTRODUCTION

There has been much interest in assessing the downstream effects and complexities of the contemporary delivery of health care. However, observational studies examining preventable adverse events are confounded by the loss of information when administrative data are abstracted from patient records. Recently, several initiatives have been directed to improve consistency, relevance and fidelity in the process of transforming clinical data into administrative datasets and subsequent practice-changing results. Following a landmark study by Iezzoni *et al*<sup>1</sup> on computerized algorithms to identify quality of care disparities in administrative datasets, the Agency for Healthcare Research and Quality (AHRQ) developed a standardized system for accrual and reporting of unintended hospital-acquired adverse events, termed patient safety indicators (PSI)<sup>2</sup>. Subsequently, Zhan *et al*<sup>3</sup> examined the relationship between multiple process-, setting- and outcome-level measures and adverse events identified using the AHRQ's PSI system, and reported substantial but variable effects on the health care system.

Nonetheless, there is a paucity of studies evaluating the burden of preventable adverse events<sup>4</sup> and this is particularly true for major surgical oncology care in the United States. Multiple studies have demonstrated that significant variation exists in cancer incidence rates<sup>5</sup> and in access to quality cancer care<sup>6 7</sup>, but variations in the actual *quality* of surgical oncology care remain unclear.

Hence, we undertook a national assessment of the quality of major surgical oncology care within a standardized framework of preventable adverse events to

1  
2  
3  
4  
5  
6  
7  
8  
9  
10  
11  
12  
13  
14  
15  
16  
17  
18  
19  
20  
21  
22  
23  
24  
25  
26  
27  
28  
29  
30  
31  
32  
33  
34  
35  
36  
37  
38  
39  
40  
41  
42  
43  
44  
45  
46  
47  
48  
49  
50  
51  
52  
53  
54  
55  
56  
57  
58  
59  
60

examine trends in patient safety within the United States. We also evaluate the prevailing hypothesis<sup>8-10</sup> explaining the volume-complication-mortality relationship, which states that higher mortality rates for patients undergoing surgery at low-volume hospitals is preferentially explained by higher failure-to-rescue rates (i.e. mortality after a hospital-acquired adverse event), rather than a higher incidence of such adverse events in the first place.

## **METHODS**

### **Data source**

The Nationwide Inpatient Sample (NIS) consists of an array of longitudinal hospital inpatients datasets as part of the Healthcare Cost and Utilization Project (HCUP). It was established by the Agency for Healthcare Research and Quality and functions through a Federal-state affiliation. It is the largest publicly accessible all-payer inpatient database<sup>11</sup>. The database consists of discharge information from 8 million inpatient visits and patients covered by multiple insurance types (including Medicare, Medicaid, private insurance and uninsured patients) are represented.

### **Study cohort**

We relied on hospital discharges for patients undergoing one of eight major cancer surgeries in the United States between 1999-2009. The major oncological surgeries consisted of colectomy, cystectomy, esophagectomy, gastrectomy, hysterectomy, pneumonectomy/lobectomy, pancreatectomy, and prostatectomy. Oncological indications were selected based on ICD-9-CM diagnostic codes. These particular procedures were chosen based on procedure volume and care was taken to include cancer surgeries involving different organ systems across a range of surgical specialties.

### **Patient and Hospital information**

1  
2  
3 Patient characteristics evaluated included age at inpatient hospitalization, race,  
4  
5 gender, insurance characteristics and comorbidities. Regarding race, patients  
6  
7 were classified as White, Black, Hispanic and Other (Asian or Pacific Islander,  
8  
9 Native American). Regarding insurance characteristics patients were categorized  
10  
11 based on the primary payer: Medicare, Medicaid, Private insurance (Blue Cross,  
12  
13 commercial carriers, private HMO's and PPO's), and other insurance types  
14  
15 (including uninsured patients). Charlson Comorbidity index (CCI) was derived  
16  
17 according to Charlson *et al*<sup>12</sup>, and adapted according to the previously defined  
18  
19 methodology of Deyo and colleagues<sup>13</sup>. Median household income of the  
20  
21 patient's ZIP code of residence, as derived from the US Census, was used as to  
22  
23 define socioeconomic status and patients were divided into quartiles: <25,000\$,  
24  
25 25,000\$–34,999\$, 35,000\$–44,999\$, and ≥45,000\$. Hospital information  
26  
27 examined included hospital location (urban vs. rural) and region (Northeast,  
28  
29 Midwest, South and West), as defined by the United States Census Bureau<sup>14</sup> and  
30  
31 academic teaching status as derived from the AHA Annual Survey of Hospitals.  
32  
33 Hospital volume was categorized into volume quartiles as previously described<sup>15</sup>.  
34  
35  
36  
37  
38  
39  
40  
41  
42  
43

### 44 **Primary Outcomes**

45  
46 The Agency for Healthcare Research and Quality (AHRQ) Patient Safety  
47  
48 Indicators (PSIs) were used to identify potentially preventable hospital-acquired  
49  
50 adverse events. For the PSI project, AHRQ commissioned experts from the  
51  
52 Evidence based Practice Center at the University of California San Francisco and  
53  
54 Stanford University and from the University of California Davis to evaluate the  
55  
56  
57  
58  
59  
60

1  
2  
3 existing literature and help develop an evidence-based approach for improving  
4 patient safety<sup>2</sup>. The objective of this project was to facilitate the identification,  
5  
6 quantification and reporting of preventable hospital-acquired adverse events from  
7  
8 routinely collected administrative information. The process of identification of PSI  
9  
10 included initial literature analysis of previously reported patient safety problems,  
11  
12 organized peer review of chosen PSIs, structured review of ICD-9 codes for each  
13  
14 PSI and finally empirical analysis of each PSI, and feedback from  
15  
16 multidisciplinary teams (physicians and specialists, nurses, pharmacists and  
17  
18 coding and experts)<sup>2</sup>. The complete set of PSIs utilized is displayed in **Table e1**  
19  
20 and is available on the AHRQ website<sup>16</sup>. The list includes various preventable  
21  
22 adverse events that have been shown to have reasonable accuracy and validity  
23  
24 as indicators for enhancing quality improvement and patient safety.  
25  
26  
27  
28  
29  
30  
31  
32  
33

### 34 **Statistical Analysis**

35  
36 Proportions, frequencies, means, medians, standard deviation, and interquartile  
37  
38 ranges were obtained for each variable. National trends in the frequency of PSI-  
39  
40 events, failure-to-rescue (defined as mortality after a PSI-event), and in-hospital  
41  
42 mortality were also analyzed as the estimated annual percentage change  
43  
44 (EAPC), based on the linear regression methodology described by Anderson *et*  
45  
46 *al*<sup>17</sup>. Logistic regression models were used to examine predictors of PSI events,  
47  
48 and to examine the effect of PSI events on multiple outcomes level measures,  
49  
50 including in-hospital mortality, excessive charges ( $\geq 75^{\text{th}}$  percentile of inflation  
51  
52 adjusted charges for each individual procedure) and prolonged length of stay  
53  
54  
55  
56  
57  
58  
59  
60

1  
2  
3 (≥75<sup>th</sup> percentile of each individual procedure). Subsequently, we examined the  
4  
5 volume-complication-mortality relationship in overall and procedure-specific  
6  
7 analyses to study the relationship between mortality at low volume hospitals and  
8  
9 failure-to-rescue rates. Generalized estimating equations were used in each  
10  
11 multivariable analysis to adjust for clustering among hospitals<sup>18</sup>. All analyses  
12  
13 were two-sided, significance was defined as  $P < 0.05$  and were performed using  
14  
15 the R statistical package (R foundation for Statistical Computing, version 2.15.1).  
16  
17  
18  
19  
20  
21  
22  
23  
24  
25  
26  
27  
28  
29  
30  
31  
32  
33  
34  
35  
36  
37  
38  
39  
40  
41  
42  
43  
44  
45  
46  
47  
48  
49  
50  
51  
52  
53  
54  
55  
56  
57  
58  
59  
60

## RESULTS

The baseline demographic characteristics of our cohort of patients >18 years old undergoing one of eight major cancer procedures in the United States between 1999-2009 (n=2,508,917) is shown in **Table 1**. A weighted estimate of 324,852 patients experienced  $\geq 1$ -PSI event (12.9%). Patients with  $\geq 1$ -PSI event were more likely to be older, be female, have higher CCI, participate in Medicare, have lower socioeconomic status, and be treated at lower volume non-academic hospitals when compared to patients who did not experience any hospital-acquired preventable adverse events.

The national trends in PSI rates, overall mortality rates and failure-to-rescue rates in patients undergoing major cancer surgery in the United States are depicted in **Figure 1**. While a steady increase in the frequency of PSI-events after major cancer surgery has occurred over the last 10 years (estimated annual % change-EAPC: 3.5%; 95% Confidence Interval-95% CI: 2.8% to 4.1%;  $P<0.001$ ), a concomitant decrease in failure-to-rescue rates (EAPC: -3.0%; 95% CI: -3.4% to -2.6%;  $P<0.001$ ) and overall mortality (EAPC: -2.3%; 95% CI: -2.7% to -1.9%;  $P<0.001$ ) was noted.

While there was a significant increase in overall PSI event rates over the course of the study, substantial heterogeneity was noted in terms of individual PSIs (**Figure 2 a-c**). Substantial increases were noted in the annual incidence of postoperative sepsis (EAPC: 14.1%, 95% CI: 12.0% to 16.2%;  $P<0.001$ ), pressure ulcer (EAPC: 13.4%, 95% CI: 10.2% to 16.6%;  $P<0.001$ ) and respiratory failure (EAPC: 5.6%, 95% CI: 4.8% to 6.4%;  $P<0.001$ ), while



1  
2  
3 significant advances were made in the prevention of anesthetic complications  
4 (EAPC: -17.5%, 95% CI: -27.6% to -7.5%; P=0.008), hip fractures (EAPC: -8.9%,  
5  
6 95% CI: -13.6% to -4.3%; P=0.005) and transfusion reactions (EAPC: -7.9%,  
7  
8 95% CI: -13.1% to -2.8%; P=0.001) in the perioperative period.  
9  
10

11  
12 Results of a multivariable logistic regression model predicting the odds of  $\geq 1$ -PSI  
13 event after major cancer surgery are shown in **Table 2**. These factors included:  
14  
15 female gender (vs. male, odds ratio-OR: 0.88, 95% confidence interval-CI: 0.86-  
16  
17 0.90; P<0.001), Black race (vs. Caucasians OR: 1.17, 95%CI: 1.13-1.21;  
18  
19 P<0.001), higher Charlson comorbidity index ( $\geq 3$  vs. 0, OR: 1.38, 95%CI: 1.34-  
20  
21 1.42; P<0.001), Medicaid (OR: 1.45, 95%CI: 1.39-1.52) and Medicare insurance  
22  
23 (OR: 1.16, 95%CI: 1.13-1.19; P<0.001), lower median household income (4<sup>th</sup>  
24  
25 quartile vs. 1<sup>st</sup> quartile, OR-0.92, 95%CI: 0.89-0.95; P<0.001) and surgeries at  
26  
27 lower volume hospitals (4<sup>th</sup> quartile vs. 1<sup>st</sup> quartile, OR: 0.76, 95%CI: 0.74-0.78;  
28  
29 P<0.001).  
30  
31  
32  
33  
34  
35

36 The occurrence of  $\geq 1$ -PSI event had significant multivariable effects on specific  
37  
38 outcome-level measures after major cancer surgery (**Table 3**). Patients who  
39  
40 suffered from  $\geq 1$ -PSI event experienced higher rates of in-hospital mortality (OR:  
41  
42 19.38, 95% CI: 18.44-20.37), prolonged length of stay (OR: 4.43, 95%CI: 4.31-  
43  
44 4.54) and excessive hospital charges (OR: 5.21, 95%CI: 5.10-5.32).  
45  
46  
47

48 We also assessed the effect of hospital volume on the incidence of PSIs and  
49  
50 failure-to-rescue (**Table 4**). In the overall analysis of patients undergoing any of  
51  
52 the eight procedures, very high-volume hospitals (4<sup>th</sup> quartile) had both lower PSI  
53  
54 event rate *and* lower failure-to-rescue rates. However, this relationship was  
55  
56  
57  
58  
59  
60

1  
2  
3 procedure-specific: for colectomy, esophagectomy, lung resection,  
4  
5  
6 pancreatotomy, and prostatectomy, very high-volume hospitals had both lower  
7  
8 PSI event rates *and* lower failure-to-rescue rates. For gastrectomy, very high-  
9  
10 volume hospitals did not have lower PSI event rates but did have lower failure-to-  
11  
12 rescue rates; for hysterectomy very high-volume hospitals had *higher* PSI event  
13  
14 rates, but had lower failure-to-rescue rates; for cystectomy very high volume-  
15  
16 hospitals had lower PSI event rates and a trend toward lower failure-to-rescue  
17  
18 rates.  
19  
20  
21  
22  
23  
24  
25  
26  
27  
28  
29  
30  
31  
32  
33  
34  
35  
36  
37  
38  
39  
40  
41  
42  
43  
44  
45  
46  
47  
48  
49  
50  
51  
52  
53  
54  
55  
56  
57  
58  
59  
60

## DISCUSSION

1  
2  
3  
4  
5  
6 Recently, it has been estimated that the annual cost of medical errors is over 17  
7 billion dollars<sup>19</sup> and there have been a slew of newer initiatives over the last  
8 decade to incentivize better quality care. In 2008, Medicare announced that it  
9 would restrain the ability of hospitals to get reimbursed for 'reasonably  
10 preventable events': avoidable medical errors ranging from pressure ulcers, falls  
11 and transfusion of incompatible blood to anesthetic complications, deep vein  
12 thrombosis and foreign bodies left in the body of patients during surgery. These  
13 and other initiatives are designed to place the burden of responsibility for such  
14 hospital-acquired adverse events squarely on hospitals and physicians<sup>20</sup>. While  
15 these initiatives have been met with stiff objection from hospital administrations,  
16 the Centers for Medicaid and Medicare Services (CMS) has been consistent in  
17 its position that accountability for such events should rest with hospitals and not  
18 with the taxpayer<sup>20</sup>. The Affordable Care Act of 2010 has added newer  
19 dimensions to these quality-improvement initiatives, with reimbursement likely to  
20 be dependent on both adherence to standards of care and the perceptions of  
21 patients with regard to hospital performance as measured by surveys<sup>21</sup>.

22  
23  
24  
25  
26  
27  
28  
29  
30  
31  
32  
33  
34  
35  
36  
37  
38  
39  
40  
41  
42  
43  
44  
45  
46  
47  
48  
49  
50  
51  
52  
53  
54  
55  
56  
57  
58  
59  
60  
A rational approach to improving accountability for substandard care should  
begin with identifying the true burden of hospital-acquired adverse events. This  
would be particularly useful in identifying specific adverse events that warrant  
special attention by payers like CMS and in preferential allocation of resources  
by hospitals due to the growing temporal burden of such events.

1  
2  
3 In the current study, we report contemporary trends in the frequency of hospital-  
4 acquired adverse events after major surgical oncology care in the United States.  
5  
6 Our study has a number of novel findings. First, we report a gradual increase in  
7  
8 the national frequency of hospital-acquired adverse events after major cancer  
9  
10 surgery over the last decade. This is important as it represents a decline, albeit  
11  
12 small and gradual, in the quality of surgical oncology care at the national level, as  
13  
14 measured by the primary prevention of PSI events. The increase may be  
15  
16 attributed to changes in case-mix, including an aging population. Conversely, the  
17  
18 emergence of multi-resistant bacteria may contribute to the recorded trends.<sup>22 23</sup>  
19  
20  
21  
22  
23  
24 Second, a simultaneous decrease in failure-to-rescue rates were observed and  
25  
26 may indicate that while primary prevention of hospital-acquired adverse events  
27  
28 has deteriorated, early recognition and timely management of these  
29  
30 complications may have improved in the last decade. These findings may explain  
31  
32 the significant annual reduction in mortality for patients undergoing major cancer  
33  
34 surgery. Nonetheless, alternate explanations include refinements in coding  
35  
36 practices, which may have led to better recognition and recording of non-lethal  
37  
38 adverse events, thereby resulting in an apparent decrease in mortality rates.  
39  
40  
41  
42  
43 Third, significant heterogeneity in the temporal dynamics of specific hospital-  
44  
45 acquired adverse events was noted. While marked and worrisome increases  
46  
47 were recorded in the frequency of postoperative sepsis, pressure ulcers and  
48  
49 respiratory failure, advances were made in the prevention of anesthetic  
50  
51 complications, transfusion-related complications and hip fractures. Thus we  
52  
53  
54  
55  
56  
57  
58  
59  
60

1  
2  
3 identify numerous setting- and process-level measures where resources need to  
4 be refocused for further improvement in the quality of surgical oncology care.  
5  
6

7  
8 We also examined the volume-complication-mortality dynamic in patients  
9  
10 undergoing major cancer surgery, as it applies to potentially preventable hospital  
11 acquired adverse events (PSI). There is a well-established body of evidence  
12 describing the volume-mortality relationship in patients undergoing major cancer  
13 procedures and other surgeries. Dudley *et al*<sup>24</sup> examined patients undergoing  
14 one of eleven diverse procedures (ranging from coronary angioplasty to  
15 esophageal cancer surgery) in California and concluded that 602 deaths could be  
16 prevented annually by transferring patients from low-volume to high-volume  
17 hospitals. Birkmeyer *et al*<sup>25</sup> reported that Medicare patients treated at very high-  
18 volume hospitals experienced up to a 12 percent difference in absolute mortality  
19 for certain procedures relative to patients treated at very low-volume hospitals.  
20  
21 However, the underlying mechanisms explaining the volume-mortality  
22 relationship have not been elucidated clearly. Silber *et al*<sup>26</sup> first introduced the  
23 concept of 'failure-to-rescue' in a seminal report that evaluated patients  
24 undergoing cholecystectomy or transurethral prostatectomy. They concluded that  
25 overall mortality was related to both hospital-level and patient-level factors, while  
26 adverse events were related to patient-level factors at admission (severity of  
27 illness). However, failure-to-rescue was preferentially associated with hospital-  
28 level factors and thus the underlying dynamics for failure-to-rescue were different  
29 than that for overall mortality and adverse events. The current hypothesis<sup>8</sup>  
30 regarding the volume-complication-mortality relationship is that lower volume  
31  
32  
33  
34  
35  
36  
37  
38  
39  
40  
41  
42  
43  
44  
45  
46  
47  
48  
49  
50  
51  
52  
53  
54  
55  
56  
57  
58  
59  
60

1  
2  
3 hospitals experience higher mortality rates not because of higher complication  
4 rates, but due to lower failure-to-rescue rates. Ghaferi *et al*<sup>10</sup> demonstrated that  
5 high and low volume hospitals enrolled in the National Surgical Quality  
6 Improvement Program (NSQIP) had similar complication rates but different  
7 failure-to-rescue rates for multiple procedures. In a subsequent analysis<sup>9</sup> of  
8 patients undergoing gastrectomy, pancreatectomy or esophagectomy, similar  
9 results were demonstrated. However, in the current study, very high-volume  
10 hospitals (4<sup>th</sup> quartile vs. 1<sup>st</sup> quartile) had both lower PSI-event rates *and* lower  
11 failure-to-rescue rates. Importantly, the volume-complication-mortality  
12 relationship, as it applies to PSI events, appears to be procedure-specific and  
13 heterogeneous, with the current hypothesis not accounting for multiple individual  
14 major cancer surgeries, namely colectomy, esophagectomy, lung resection,  
15 pancreatectomy and prostatectomy. This is an important point: CMS currently  
16 focuses its quality-improvement initiatives on complication rates, and explicit  
17 demonstration that lower failure-to-rescue rates and not higher complication rates  
18 underlie the substandard care at low-volume hospitals may require a re-  
19 consideration of these initiatives. Our findings indicate that the prevailing  
20 hypothesis may need to be re-evaluated, at least for patients undergoing major  
21 cancer surgery. In fact, for patients undergoing hysterectomy, this relationship is  
22 reversed, with patients at very high-volume hospitals experiencing *higher* PSI  
23 event rates and lower failure-to-rescue rates. The underlying reason for this  
24 finding is not clear. Previous studies<sup>27</sup> have questioned the impact of hospital  
25 volume on hysterectomy outcomes and have reported that surgeon volume  
26  
27  
28  
29  
30  
31  
32  
33  
34  
35  
36  
37  
38  
39  
40  
41  
42  
43  
44  
45  
46  
47  
48  
49  
50  
51  
52  
53  
54  
55  
56  
57  
58  
59  
60

1  
2  
3 trumps hospital volume as the predominant factor underlying the volume-  
4  
5 outcomes relationship for hysterectomy. While inclusion of surgeon volume may  
6  
7 alter these findings, the higher rates of adverse events in patients undergoing  
8  
9 hysterectomy at very high-volume hospitals may need to be re-examined in  
10  
11 future reports.  
12  
13

14  
15 Our study is not without limitations. The drawbacks of using administrative data  
16  
17 are well known<sup>28</sup>, including limitations regarding risk-adjustment and miscoding.  
18  
19 While PSIs have been shown to perform well as screening tools from an  
20  
21 epidemiologic perspective (over-identification and few false-negatives), problems  
22  
23 related to high false-positive rates exist, with most validation studies reporting  
24  
25 positive predictive values of between 43 to >90%<sup>29 30</sup>. While it is clear that these  
26  
27 drawbacks limit the use of PSIs to make reimbursement decisions or to compare  
28  
29 hospitals, it is unclear how it affects the implications of our study, where it was  
30  
31 used as a screening tool to *identify* adverse events<sup>29 30</sup>. Secondly, morbidity and  
32  
33 mortality events in the NIS are characterized based on the index admission, and  
34  
35 subsequent readmissions, while relevant, are not recorded. This may have  
36  
37 resulted in under-recognition of the true burden of adverse events, mortality and  
38  
39 charges after the initial cancer surgery. Third: while the heterogeneity identified in  
40  
41 the volume-complication-mortality relationship is a key finding in the present  
42  
43 report, our study design does not allow for the identification of underlying  
44  
45 mechanisms explaining these results. It is also important to emphasize that, in  
46  
47 contrast to the previously cited studies where overall complication rates were  
48  
49 examined, we evaluated potentially preventable hospital acquired events only.  
50  
51  
52  
53  
54  
55  
56  
57  
58  
59  
60

1  
2  
3 Previous investigators have shown that this restricted definition has limitations  
4 since not all deaths are accounted for in a given population sample<sup>31</sup>;  
5  
6 alternatively, these drawbacks may not apply to studies focusing on patient  
7  
8 safety using PSI as a quality of care measure. Hence, while it may not be illogical  
9  
10 to expect lower volume hospitals to provide substandard care secondary to both  
11  
12 higher rates of preventable adverse events *and* higher failure-to-rescue rates, it  
13  
14 is certainly possible that a majority of hospital-acquired complications are an  
15  
16 inevitable result of procedure complexity and patient comorbidities (and not just a  
17  
18 failure of setting-level prevention measures). Consequently, while more rigorous  
19  
20 patient care pathways might explain the lower incidence of preventable adverse  
21  
22 events and subsequent mortality in higher volume hospitals, for the majority of  
23  
24 (non-preventable) adverse events, the incidence rates would be the same  
25  
26 regardless of hospital volume with lower failure-to-rescue rates preferentially  
27  
28 explaining the low mortality rates of higher volume hospitals. Further  
29  
30 investigation of these findings is required to test these possibilities and to fully  
31  
32 understand the underlying dynamics of the volume-mortality relationship.  
33  
34  
35  
36  
37  
38  
39  
40  
41  
42  
43  
44  
45  
46  
47  
48  
49  
50  
51  
52  
53  
54  
55  
56  
57  
58  
59  
60



## CONCLUSION

Over the past decade, there has been a substantial increase in the national frequency of potentially avoidable hospital-acquired adverse events after major cancer surgery, with a detrimental effect on numerous outcome-level measures. However, there was a concomitant reduction in failure-to-rescue rates and, consequently, overall-mortality rates. Policy changes and resource re-allocation to improve the increasing burden of specific adverse events, such as postoperative sepsis, pressure ulcer and respiratory failure, are required.

1  
2  
3 **ACKNOWLEDGEMENTS:** None  
4  
5  
6  
7

8 **COMPETING INTEREST AND FUNDING:** No potential conflicts of interest. No  
9  
10 source of financial or material support for the preparation of this manuscript. No  
11  
12 Disclaimers.  
13

14  
15  
16  
17 **Contributorship Statement:** Everyone listed as an author for this manuscript  
18 fulfils all three of the ICMJE guidelines for authorship. All authors have made  
19 substantial contributions to each of the following categories:  
20

- 21 1. Conception and design, acquisition of data, or analysis and interpretation of  
22 data  
23  
24 2. Drafting the article or revising it critically for important intellectual content  
25  
26 3. Final approval of the version to be published.  
27

28  
29 I, Florian Roghmann, the Corresponding Author of this article contained within  
30 the original manuscript which includes any diagrams & photographs, other  
31 illustrative material, video, film or any other material howsoever submitted by the  
32 Contributors at any time and related to the Contribution have the right to grant on  
33 behalf of all authors and do grant on behalf of all authors, a licence to the BMJ  
34 Publishing Group Ltd and its licensees, to permit this Contribution (if accepted) to  
35 be published in BMJ Open and any other BMJ Group products and to exploit all  
36 subsidiary rights, as set out in the licence at:  
37 ([http://group.bmj.com/products/journals/instructions-for-](http://group.bmj.com/products/journals/instructions-for-authors/BMJOpen_licence.pdf)  
38 authors/BMJOpen\_licence.pdf)  
39  
40  
41  
42

43 **Data sharing:** No additional data available.  
44  
45  
46  
47  
48  
49  
50  
51  
52  
53  
54  
55  
56  
57  
58  
59  
60

## REFERENCES

1. Iezzoni LI, Foley SM, Heeren T, et al. A method for screening the quality of hospital care using administrative data: preliminary validation results. *QRB. Quality review bulletin* 1992;18(11):361-71.
2. [http://www.qualityindicators.ahrq.gov/modules/psi\\_resources.aspx](http://www.qualityindicators.ahrq.gov/modules/psi_resources.aspx) Accessed on 9/9/12.
3. Zhan C, Miller MR. Excess length of stay, charges, and mortality attributable to medical injuries during hospitalization. *JAMA : the journal of the American Medical Association* 2003;290(14):1868-74.
4. Downey JR, Hernandez-Boussard T, Banka G, et al. Is patient safety improving? National trends in patient safety indicators: 1998-2007. *Health services research* 2012;47(1 Pt 2):414-30.
5. Siegel R, Naishadham D, Jemal A. Cancer statistics, 2012. *CA Cancer J Clin* 2012;62(1):10-29.
6. Ross JS, Bradley EH, Busch SH. Use of health care services by lower-income and higher-income uninsured adults. *JAMA : the journal of the American Medical Association* 2006;295(17):2027-36.
7. Liu JH, Zingmond DS, McGory ML, et al. Disparities in the utilization of high-volume hospitals for complex surgery. *JAMA* 2006;296(16):1973-80.
8. Ghaferi AA, Dimick JB. Variation in mortality after high-risk cancer surgery: failure to rescue. *Surgical oncology clinics of North America* 2012;21(3):389-95, vii.
9. Ghaferi AA, Birkmeyer JD, Dimick JB. Hospital volume and failure to rescue with high-risk surgery. *Medical care* 2011;49(12):1076-81.
10. Ghaferi AA, Birkmeyer JD, Dimick JB. Variation in hospital mortality associated with inpatient surgery. *The New England journal of medicine* 2009;361(14):1368-75.
11. <http://www.hcup-us.ahrq.gov/nisoverview.jsp> (Accessed on 9/9/12).
12. Charlson ME, Pompei P, Ales KL, et al. A new method of classifying prognostic comorbidity in longitudinal studies: development and validation. *Journal of chronic diseases* 1987;40(5):373-83.
13. Deyo R, Cherkin D, Ciol M. Adapting a clinical comorbidity index for use with ICD-9-CM administrative databases. *J Clin Epidemiol* 1992;45(6):613-9.
14. United States Census Bureau. 2000 [cited 2010]; Available from: <http://www.census.gov>.
15. Trinh QD, Sun M, Sammon J, et al. Disparities in access to care at high-volume institutions for uro-oncologic procedures. *Cancer* 2012;118(18):4421-6.
16. [http://www.qualityindicators.ahrq.gov/Modules/PSI\\_TechSpec.aspx](http://www.qualityindicators.ahrq.gov/Modules/PSI_TechSpec.aspx) (Accessed on 9/9/12).
17. Anderson WF, Camargo MC, Fraumeni JF, Jr., et al. Age-specific trends in incidence of noncardia gastric cancer in US adults. *JAMA : the journal of the American Medical Association* 2010;303(17):1723-8.

18. Panageas KS, Schrag D, Riedel E, et al. The effect of clustering of outcomes on the association of procedure volume and surgical outcomes. *Annals of internal medicine* 2003;139(8):658-65.
19. Van Den Bos J, Rustagi K, Gray T, et al. The \$17.1 billion problem: the annual cost of measurable medical errors. *Health affairs (Project Hope)* 2011;30(4):596-603.
20. Milstein A. Ending extra payment for "never events"--stronger incentives for patients' safety. *The New England journal of medicine* 2009;360(23):2388-90.
21. <http://patients.about.com/od/AffordableCareAct/a/Affordable-Care-Act-And-Patient-Satisfaction-In-Hospitals.htm> Accessed on 9/9/12.
22. Wellington EM, Boxall AB, Cross P, et al. The role of the natural environment in the emergence of antibiotic resistance in gram-negative bacteria. *The Lancet infectious diseases* 2013;13(2):155-65.
23. Kaye KS, Schmader KE, Sawyer R. Surgical site infection in the elderly population. *Clinical infectious diseases : an official publication of the Infectious Diseases Society of America* 2004;39(12):1835-41.
24. Dudley RA, Johansen KL, Brand R, et al. Selective referral to high-volume hospitals: estimating potentially avoidable deaths. *JAMA* 2000;283(9):1159-66.
25. Birkmeyer JD, Siewers AE, Finlayson EV, et al. Hospital volume and surgical mortality in the United States. *The New England journal of medicine* 2002;346(15):1128-37.
26. Silber JH, Williams SV, Krakauer H, et al. Hospital and patient characteristics associated with death after surgery. A study of adverse occurrence and failure to rescue. *Medical care* 1992;30(7):615-29.
27. Wright JD, Lewin SN, Deutsch I, et al. Effect of surgical volume on morbidity and mortality of abdominal hysterectomy for endometrial cancer. *Obstetrics and gynecology* 2011;117(5):1051-9.
28. Sarrazin MS, Rosenthal GE. Finding pure and simple truths with administrative data. *JAMA : the journal of the American Medical Association* 2012;307(13):1433-5.
29. Henderson KE, Recktenwald A, Reichley RM, et al. Clinical validation of the AHRQ postoperative venous thromboembolism patient safety indicator. *Joint Commission journal on quality and patient safety / Joint Commission Resources* 2009;35(7):370-6.
30. Kaafarani HM, Borzecki AM, Itani KM, et al. Validity of selected Patient Safety Indicators: opportunities and concerns. *Journal of the American College of Surgeons* 2011;212(6):924-34.
31. Silber JH, Romano PS, Rosen AK, et al. Failure-to-rescue: comparing definitions to measure quality of care. *Medical care* 2007;45(10):918-25.

## FIGURE LEGENDS

**FIGURE 1.** National trends in Patient Safety Indicator (PSI) rates, overall mortality rates and failure-to-rescue rates in patients undergoing major cancer surgery (MCS) in the United States (1999-2009); EAPC-Estimated Annual Percent Change

**FIGURE 2 a-c.** National trends in individual Patient Safety Indicators over the study period (1999-2009) in patients undergoing major cancer surgery (MCS) in the United States

**Table 1.** Baseline characteristics of patients > 18 years undergoing major cancer surgery, Nationwide Inpatient Sample, 1999-2009.

| Variables                                  | Baseline characteristics |                       |                    |                     |
|--------------------------------------------|--------------------------|-----------------------|--------------------|---------------------|
|                                            | Overall (%)              | Without PSI event (%) | With PSI event (%) | P                   |
| <b>Weighted number of patients</b>         | 2508917                  | 2184065 (87.1)        | 324852 (12.9)      | –                   |
| <b>Age (years)</b>                         |                          |                       |                    |                     |
| Mean (SD)                                  | 65.9 (11.7)              | 65.4 (11.6)           | 69.5 (11.7)        | <0.001 <sup>2</sup> |
| Median (IQR)                               | 66 (58,74)               | 65 (57,73)            | 71 (62,78)         |                     |
| <b>Gender</b>                              |                          |                       |                    |                     |
| Male                                       | 1511361 (60.3)           | 1331716 (61.1)        | 179645 (55.3)      | <0.001              |
| Female                                     | 993704 (39.7)            | 848527 (38.9)         | 145177 (44.7)      |                     |
| <b>Race</b>                                |                          |                       |                    |                     |
| Caucasian                                  | 1525021 (60.8)           | 1324373 (60.6)        | 200648 (61.8)      | <0.001              |
| Black                                      | 177986 (7.1)             | 154028 (7.1)          | 23958 (7.4)        |                     |
| Hispanic                                   | 98532 (3.9)              | 86128 (3.9)           | 12404 (3.8)        |                     |
| Other                                      | 93041 (3.7)              | 81492 (3.6)           | 11549 (3.6)        |                     |
| Unknown                                    | 614337 (24.5)            | 76293 (23.5)          | 76293 (23.5)       |                     |
| <b>CCI</b>                                 |                          |                       |                    |                     |
| 0                                          | 1566723 (62.4)           | 1412545 (64.7)        | 154178 (47.5)      | <0.001              |
| 1                                          | 623985 (24.9)            | 516640 (23.7)         | 107345 (33.0)      |                     |
| 2                                          | 127538 (5.1)             | 102276 (4.7)          | 25262 (7.8)        |                     |
| ≥3                                         | 190670 (7.6)             | 152603 (7.0)          | 38067 (11.7)       |                     |
| <b>Insurance status</b>                    |                          |                       |                    |                     |
| Private                                    | 1057919 (42.2)           | 968015 (44.3)         | 89904 (27.7)       | <0.001              |
| Medicaid                                   | 80666 (3.2)              | 66947 (3.1)           | 13719 (4.2)        |                     |
| Medicare                                   | 1265920 (50.5)           | 1056618 (48.4)        | 209302 (64.4)      |                     |
| Other                                      | 104412 (4.2)             | 92485 (4.2)           | 11927 (3.7)        |                     |
| <b>Median household income by ZIP code</b> |                          |                       |                    |                     |
| 1-24,999                                   | 369796 (14.7)            | 313652 (14.4)         | 56144 (17.3)       | <0.001              |
| 25,000-34,999                              | 596202 (23.8)            | 513758 (23.5)         | 82444 (25.4)       |                     |
| 35,000-44,999                              | 646869 (25.8)            | 563398 (25.8)         | 83471 (25.7)       |                     |
| 45,000+                                    | 842375 (33.6)            | 746499 (34.2)         | 95876 (29.5)       |                     |
| Unknown                                    | 53672 (2.1)              | 46757 (2.1)           | 6915 (2.1)         |                     |
| <b>Annual hospital volume</b>              |                          |                       |                    |                     |
| 1st quartile                               | 591675 (23.6)            | 510024 (23.4)         | 81651 (25.1)       | <0.001              |
| 2nd quartile                               | 640229 (25.5)            | 551980 (25.3)         | 88249 (27.2)       |                     |
| 3rd quartile                               | 636482 (25.4)            | 554325 (25.4)         | 82157 (25.3)       |                     |
| 4th quartile                               | 640531 (25.5)            | 567737 (26.0)         | 72794 (22.4)       |                     |
| <b>Hospital location</b>                   |                          |                       |                    |                     |
| Rural                                      | 268349 (10.7)            | 235606 (10.8)         | 32743 (10.1)       | <0.001              |
| Urban                                      | 2239651 (89.3)           | 1947705 (89.2)        | 291946 (89.9)      |                     |
| <b>Hospital region</b>                     |                          |                       |                    |                     |
| Northeast                                  | 526593 (21.)             | 458684 (21.0)         | 67909 (20.9)       | <0.001              |
| Midwest                                    | 608988 (24.3)            | 532951 (24.4)         | 76037 (23.4)       |                     |
| South                                      | 8822566 (35.2)           | 762212 (34.9)         | 120354 (37.0)      |                     |
| West                                       | 490770 (19.6)            | 430218 (19.7)         | 60552 (18.6)       |                     |
| <b>Hospital teaching status</b>            |                          |                       |                    |                     |
| Non-teaching                               | 1135065 (45.3)           | 979636 (44.9)         | 155429 (47.9)      | <0.001              |
| Teaching                                   | 1372935 (54.7)           | 1203675 (55.1)        | 169260 (52.1)      |                     |

<sup>1</sup> Multivariable logistic regression analysis adjusted for hospital clustering by generalized estimating equations<sup>2</sup> Mann-Whitney test was performed.**Table 2.** Multivariable logistic regression predicting occurrence of at least 1 patient safety indicator event

| Variables                                  | Multivariable predictors of $\geq 1$ PSI event <sup>1</sup> |        |
|--------------------------------------------|-------------------------------------------------------------|--------|
|                                            | OR (95% CI)                                                 | P      |
| <b>Weighted number of patients</b>         |                                                             |        |
| <b>Age (years)</b>                         | 1.018 (1.017 - 1.019)                                       | <0.001 |
| <b>Gender</b>                              |                                                             |        |
| Male                                       | 1.0 (ref.)                                                  | –      |
| Female                                     | 0.878 (0.862 - 0.895)                                       | <0.001 |
| <b>Race</b>                                |                                                             |        |
| Caucasian                                  | 1.0 (ref.)                                                  | –      |
| Black                                      | 1.172 (1.132 - 1.213)                                       | <0.001 |
| Hispanic                                   | 0.973 (0.930 - 1.019)                                       | 0.245  |
| Other                                      | 0.938 (0.895 - 0.983)                                       | 0.008  |
| Unknown                                    | 1.010 (0.988 - 1.033)                                       | 0.366  |
| <b>CCI</b>                                 |                                                             |        |
| 0                                          | 1.0 (ref.)                                                  | –      |
| 1                                          | 1.227 (1.203 - 1.252)                                       | <0.001 |
| 2                                          | 1.188 (1.147 - 1.230)                                       | <0.001 |
| $\geq 3$                                   | 1.377 (1.336 - 1.419)                                       | <0.001 |
| <b>Insurance status</b>                    |                                                             |        |
| Private                                    | 1.0 (ref.)                                                  | –      |
| Medicaid                                   | 1.454 (1.388 - 1.523)                                       | <0.001 |
| Medicare                                   | 1.155 (1.127 - 1.185)                                       | <0.001 |
| Other                                      | 1.127 (1.075 - 1.181)                                       | <0.001 |
| <b>Median household income by ZIP code</b> |                                                             |        |
| 1-24,999                                   | 1.0 (ref.)                                                  | –      |
| 25,000-34,999                              | 0.986 (0.959 - 1.013)                                       | 0.305  |
| 35,000-44,999                              | 0.960 (0.934 - 0.987)                                       | 0.004  |
| 45,000+                                    | 0.920 (0.894 - 0.946)                                       | <0.001 |
| Unknown                                    | 1.003 (0.943 - 1.067)                                       | 0.929  |
| <b>Annual hospital volume</b>              |                                                             |        |
| 1st quartile                               | 1.0 (ref.)                                                  | –      |
| 2nd quartile                               | 0.945 (0.922 - 0.969)                                       | <0.001 |
| 3rd quartile                               | 0.883 (0.860 - 0.907)                                       | <0.001 |
| 4th quartile                               | 0.761 (0.739 - 0.783)                                       | <0.001 |
| <b>Hospital location</b>                   |                                                             |        |
| Rural                                      | 1.0 (ref.)                                                  | –      |
| Urban                                      | 1.236 (1.198 - 1.275)                                       | <0.001 |
| <b>Hospital region</b>                     |                                                             |        |
| Northeast                                  | 1.0 (ref.)                                                  | –      |
| Midwest                                    | 0.991 (0.964 - 1.019)                                       | 0.541  |
| South                                      | 1.049 (1.024 - 1.075)                                       | <0.001 |
| West                                       | 1.018 (0.989 - 1.047)                                       | 0.229  |
| <b>Hospital teaching status</b>            |                                                             |        |
| Non-teaching                               | 1.0 (ref.)                                                  | –      |
| Teaching                                   | 0.972 (0.952 - 0.992)                                       | 0.007  |

<sup>1</sup>Other predictors included procedure type [colectomy-ref; cystectomy (OR: 1.51, 95%CI: 1.45-1.57), esophagectomy(OR:5.16, 95%CI:4.81-5.54), gastrectomy(OR:2.01, 95%CI:1.93-2.09), hysterectomy(OR:0.56, 95%CI:0.54-0.58), lung resection(OR:2.44, 95%CI:2.39-2.50), pancreatectomy(OR:1.79, 95%CI:1.71-1.88),prostatectomy(OR:0.26, 95%CI:0.25-0.27)] and year of surgery (OR: 1.037, 95%CI: 1.034-1.040). All P<0.001. OR-Odds ratio. CI: confidence interval

**Table 3.** Multivariable effects of  $\geq 1$  Patient safety indicator events on in-hospital mortality, prolonged length of stay and excessive hospital charges in patients undergoing major cancer surgery in the United States between 1999-2009.

| Variables                             | $\geq 1$ Patient safety indicator vs. no PSI |        |
|---------------------------------------|----------------------------------------------|--------|
|                                       | OR (95% CI)**                                | P      |
| In-hospital mortality (n=51312)*      | 19.380 (18.439 - 20.368)                     | <0.001 |
| Prolonged length of stay (n=888220)   | 4.426 (4.313 - 4.542)                        | <0.001 |
| Excessive hospital charges (n=609128) | 5.207 (5.097 - 5.319)                        | <0.001 |

\* 1457 patients with missing in-hospital mortality data.

\*\* Each of these effects was derived from individual multivariable logistic regression models adjusted for hospital clustering, procedure type, age, gender, race, CCI, insurance status, socioeconomic status, year of admission, hospital location, hospital region, hospital volume quartiles and institutional academic status.

**Legend.** OR: odds ratio, CI: confidence interval, PSI: patient safety indicator; CCI: Charlson comorbidity index.



**Table 4.** Impact of hospital volume effect on patient safety indicator event occurrence and on failure to rescue (death after patient safety indicator event) from individual multivariable logistic regression models adjusted for hospital clustering by generalized estimating equation in patients undergoing major cancer surgery, Nationwide Inpatient Sample, 1999-2009.

| Procedure                       | Patient safety indicator occurrence |         | Failure to rescue     |         |
|---------------------------------|-------------------------------------|---------|-----------------------|---------|
|                                 | OR (95% CI)                         | P-value | OR (95% CI)           | P-value |
| <b>Overall</b>                  |                                     |         |                       |         |
| 1 <sup>st</sup> volume quartile | 1.0 (ref.)                          | -       | 1.0 (ref.)            | -       |
| 2 <sup>nd</sup> volume quartile | 0.945 (0.922 - 0.969)               | <0.001  | 0.920 (0.861 - 0.982) | 0.013   |
| 3 <sup>rd</sup> volume quartile | 0.883 (0.860 - 0.907)               | <0.001  | 0.842 (0.784 - 0.904) | <0.001  |
| 4 <sup>th</sup> volume quartile | 0.761 (0.739 - 0.783)               | <0.001  | 0.716 (0.661 - 0.775) | <0.001  |
| <b>Colectomy</b>                |                                     |         |                       |         |
| 1 <sup>st</sup> volume quartile | 1.0 (ref.)                          | -       | 1.0 (ref.)            | -       |
| 2 <sup>nd</sup> volume quartile | 1.007 (0.969 - 1.046)               | 0.728   | 1.029 (0.936 - 1.132) | 0.553   |
| 3 <sup>rd</sup> volume quartile | 0.940 (0.902 - 0.980)               | 0.003   | 0.978 (0.883 - 1.083) | 0.670   |
| 4 <sup>th</sup> volume quartile | 0.842 (0.805 - 0.881)               | <0.001  | 0.831 (0.742 - 0.931) | 0.001   |
| <b>Cystectomy</b>               |                                     |         |                       |         |
| 1 <sup>st</sup> volume quartile | 1.0 (ref.)                          | -       | 1.0 (ref.)            | -       |
| 2 <sup>nd</sup> volume quartile | 0.816 (0.728 - 0.914)               | <0.001  | 0.872 (0.642 - 1.185) | 0.382   |
| 3 <sup>rd</sup> volume quartile | 0.760 (0.672 - 0.860)               | <0.001  | 0.691 (0.487 - 0.981) | 0.039   |
| 4 <sup>th</sup> volume quartile | 0.585 (0.509 - 0.671)               | <0.001  | 0.706 (0.471 - 1.058) | 0.092   |
| <b>Esophagectomy</b>            |                                     |         |                       |         |
| 1 <sup>st</sup> volume quartile | 1.0 (ref.)                          | -       | 1.0 (ref.)            | -       |
| 2 <sup>nd</sup> volume quartile | 0.802 (0.653 - 0.986)               | 0.037   | 0.633 (0.432 - 0.928) | 0.019   |
| 3 <sup>rd</sup> volume quartile | 0.687 (0.546 - 0.863)               | 0.001   | 0.488 (0.309 - 0.770) | 0.002   |
| 4 <sup>th</sup> volume quartile | 0.479 (0.378 - 0.609)               | <0.001  | 0.459 (0.280 - 0.753) | 0.002   |
| <b>Gastrectomy</b>              |                                     |         |                       |         |
| 1 <sup>st</sup> volume quartile | 1.0 (ref.)                          | -       | 1.0 (ref.)            | -       |
| 2 <sup>nd</sup> volume quartile | 1.043 (0.935 - 1.163)               | 0.455   | 1.028 (0.820 - 1.289) | 0.812   |
| 3 <sup>rd</sup> volume quartile | 0.973 (0.866 - 1.093)               | 0.642   | 0.847 (0.660 - 1.088) | 0.193   |
| 4 <sup>th</sup> volume quartile | 0.905 (0.795 - 1.030)               | 0.129   | 0.709 (0.532 - 0.945) | 0.019   |
| <b>Hysterectomy</b>             |                                     |         |                       |         |
| 1 <sup>st</sup> volume quartile | 1.0 (ref.)                          | -       | 1.0 (ref.)            | -       |
| 2 <sup>nd</sup> volume quartile | 1.044 (0.930 - 1.172)               | 0.468   | 0.955 (0.895 - 1.020) | 0.168   |
| 3 <sup>rd</sup> volume quartile | 1.264 (1.118 - 1.428)               | <0.001  | 0.874 (0.815 - 0.938) | <0.001  |
| 4 <sup>th</sup> volume quartile | 1.231 (1.083 - 1.399)               | 0.001   | 0.758 (0.701 - 0.820) | <0.001  |
| <b>Lung</b>                     |                                     |         |                       |         |
| 1 <sup>st</sup> volume quartile | 1.0 (ref.)                          | -       | 1.0 (ref.)            | -       |
| 2 <sup>nd</sup> volume quartile | 0.954 (0.911 - 1.000)               | 0.048   | 0.820 (0.720 - 0.934) | 0.003   |
| 3 <sup>rd</sup> volume quartile | 0.910 (0.866 - 0.956)               | <0.001  | 0.755 (0.657 - 0.867) | <0.001  |
| 4 <sup>th</sup> volume quartile | 0.792 (0.750 - 0.836)               | <0.001  | 0.643 (0.548 - 0.753) | <0.001  |
| <b>Pancreatectomy</b>           |                                     |         |                       |         |
| 1 <sup>st</sup> volume quartile | 1.0 (ref.)                          | -       | 1.0 (ref.)            | -       |
| 2 <sup>nd</sup> volume quartile | 0.767 (0.676 - 0.870)               | <0.001  | 0.598 (0.460 - 0.775) | <0.001  |
| 3 <sup>rd</sup> volume quartile | 0.539 (0.468 - 0.621)               | <0.001  | 0.405 (0.291 - 0.564) | <0.001  |
| 4 <sup>th</sup> volume quartile | 0.416 (0.357 - 0.485)               | <0.001  | 0.362 (0.250 - 0.525) | <0.001  |
| <b>Prostatectomy</b>            |                                     |         |                       |         |
| 1 <sup>st</sup> volume quartile | 1.0 (ref.)                          | -       | 1.0 (ref.)            | -       |
| 2 <sup>nd</sup> volume quartile | 0.772 (0.713 - 0.837)               | <0.001  | 1.293 (0.696 - 2.403) | 0.415   |
| 3 <sup>rd</sup> volume quartile | 0.736 (0.673 - 0.805)               | <0.001  | 1.335 (0.687 - 2.591) | 0.394   |
| 4 <sup>th</sup> volume quartile | 0.541 (0.488 - 0.600)               | <0.001  | 0.293 (0.085 - 1.006) | 0.051   |

<sup>1</sup>Multivariable models were generated for the overall model and for each procedure individually. Only the odds ratio (OR) and 95% confidence intervals (CI) for hospital volume are displayed in the table. Other covariates in each model included: age, gender, race, comorbidities, median household income by ZIP code, hospital location, teaching status, region, year of admission and procedure type (for overall model only)

| Patient Safety Indicator                                                                         | ICD-9-CM                                                                                                        |
|--------------------------------------------------------------------------------------------------|-----------------------------------------------------------------------------------------------------------------|
| Anesthetic Complications                                                                         | E8763, E9381, E9382, E9383, E9384, E9385, E9386, E9387, E9389, 9681, 9682, 9683, 9684, 9687, E8551              |
| Pressure Ulcers                                                                                  | 7072X, 7070, 70700, 70701, 70702, 70703, 70704, 70705, 70706, 70707, 70709                                      |
| Foreign Body                                                                                     | 9984, 9987, E871X                                                                                               |
| Iatrogenic Pneumothorax                                                                          | 5121                                                                                                            |
| Central Venous Catheter-Related Blood Stream Infection                                           | 99662, 9993, 99931, 99932                                                                                       |
| Postoperative Hip Fracture                                                                       | 820XX                                                                                                           |
| Postoperative Hemorrhage or Hematoma                                                             | 9981X, 388X, 3941, 3998, 4995, 5793, 6094, 1809, 540, 5412, 6094, 5919, 610, 6998, 7014, 7109, 7591, 7592, 8604 |
| Postoperative Physiologic and Metabolic Derangement (Secondary Diabetes or Acute Kidney Failure) | 249XX, 2501X, 2502X, 2503X, 584X, 586, 9975                                                                     |
| Postoperative Physiologic and Metabolic Derangement (Dialysis)                                   | 3995, 5498                                                                                                      |
| Postoperative Respiratory Failure                                                                | 5185X, 51881, 51884, 9672, 9670, 9671, 9604                                                                     |
| Postoperative Deep Vein Thrombosis or Pulmonary Embolus                                          | 4511X, 4512, 45181, 4519, 4534X, 4538, 4539, 4151X                                                              |
| Postoperative Sepsis                                                                             | 038X, 038XX, 9980X, 9959X                                                                                       |
| Postoperative Wound Dehiscence                                                                   | 5461                                                                                                            |
| Accidental Puncture or Laceration                                                                | E870X, 9982                                                                                                     |
| Transfusion Reaction                                                                             | 9996X, 9997X, E8760                                                                                             |

# NATIONAL TRENDS IN HOSPITAL-ACQUIRED PREVENTABLE ADVERSE EVENTS AFTER MAJOR CANCER SURGERY IN THE UNITED STATES

Shyam Sukumar<sup>1\*</sup>, Florian Roghmann<sup>2, 3\*</sup>, Vincent Q. Trinh<sup>2</sup>, Jesse D. Sammon<sup>1</sup>, Mai-Kim Gervais<sup>4</sup>, Hung-Jui Tan<sup>5</sup>, Praful Ravi<sup>1</sup>, Simon P. Kim<sup>6</sup>, Jim C. Hu<sup>7</sup>, Pierre I. Karakiewicz<sup>2</sup>, Joachim Noldus<sup>3</sup>, Maxine Sun<sup>2</sup>, Mani Menon<sup>1</sup>, Quoc-Dien Trinh<sup>2,8</sup>

\*Denotes equal contribution

<sup>1</sup>Center for Outcomes Research and Analytics, Henry Ford Health System, Detroit, MI, USA

<sup>2</sup>Cancer Prognostics and Health Outcomes Unit, University of Montreal Health Center, Montreal, Canada

<sup>3</sup>Department of Urology, Ruhr University Bochum, Marienhospital, Herne, Germany

<sup>4</sup>Division of General Surgery, University of Montreal Health Center, Montreal, Canada

<sup>5</sup>Dow Division of Health Services Research, University of Michigan, Ann Arbor, MI, USA

<sup>6</sup>Department of Urology, Mayo Clinic, Rochester, MN, USA

<sup>7</sup>Department of Urology, David Geffen School of Medicine, University of California, Los Angeles, Los Angeles, CA, USA

<sup>8</sup>Department of Surgery, Division of Urology, Brigham and Women's Hospital / Dana-Farber Cancer Institute, Harvard Medical School, Boston, MA

## **Address all correspondence to:**

Florian Roghmann, MD  
Cancer Prognostics and Health Outcomes Unit  
264 blvd. Rene-Levesque E. suite 228  
Montreal, QC, H2X 1P1, Canada  
Tel: 514-890-8000 ext: 35335  
Fax: 514-227-5103  
Email: [f.roghmann@gmail.com](mailto:f.roghmann@gmail.com)

**Word count:** abstract (272), manuscript (2981, excluding title page, abstract, references, figures, figure legends and tables), 25 pages, 28 references, 4 tables, 4 figures, 1 appendix

**Keywords:** Patient Safety Indicators; Preventable Adverse Events; Surgery; Quality of Care; Cancer surgery; Quality Improvement; Hospital Acquired Adverse Events

**Running Head:** Preventable Adverse Events after Cancer Surgery

1  
2  
3  
4  
5  
6  
7  
8  
9  
10  
11  
12  
13  
14  
15  
16  
17  
18  
19  
20  
21  
22  
23  
24  
25  
26  
27  
28  
29  
30  
31  
32  
33  
34  
35  
36  
37  
38  
39  
40  
41  
42  
43  
44  
45  
46  
47  
48  
49  
50  
51  
52  
53  
54  
55  
56  
57  
58  
59  
60

**Contributorship Statement:** Everyone listed as an author for this manuscript fulfils all three of the ICMJE guidelines for authorship. All authors have made substantial contributions to each of the following categories:

1. Conception and design, acquisition of data, or analysis and interpretation of data
2. Drafting the article or revising it critically for important intellectual content
3. Final approval of the version to be published.

I, Florian Roghmann, the Corresponding Author of this article contained within the original manuscript which includes any diagrams & photographs, other illustrative material, video, film or any other material howsoever submitted by the Contributors at any time and related to the Contribution have the right to grant on behalf of all authors and do grant on behalf of all authors, a licence to the BMJ Publishing Group Ltd and its licensees, to permit this Contribution (if accepted) to be published in BMJ Open and any other BMJ Group products and to exploit all subsidiary rights, as set out in the licence at:

([http://group.bmj.com/products/journals/instructions-for-authors/BMJOpen\\_licence.pdf](http://group.bmj.com/products/journals/instructions-for-authors/BMJOpen_licence.pdf))

**Data sharing:** There is no additional data available.

## ABSTRACT

**Objectives:** While multiple studies have demonstrated variations in the quality of cancer-care in the U.S., payers are increasingly assessing structure-and process-level measures to promote quality improvement. Hospital-acquired-adverse events are one such measure and we examine their national trends after major cancer surgery.

**Design:** Retrospective, cross-sectional analysis of a weighted-national estimate from the Nationwide Inpatient Sample undergoing major oncological procedures (colectomy, cystectomy, esophagectomy, gastrectomy, hysterectomy, lung resection, pancreatectomy and prostatectomy). The Agency for Healthcare Research and Quality Patient Safety Indicators (PSIs) were utilized to identify trends in hospital-acquired-adverse events.

**Setting:** Secondary and tertiary care, U.S. hospitals in the Nationwide Inpatient Sample (NIS)

**Participants:** A weighted-national estimate of 2,508,917 patients (>18 years, 1999-2009) from the NIS.

**Primary outcome measures:** Hospital-acquired-adverse events.

**Results:** 324,852 patients experienced  $\geq 1$ -PSI event (12.9%). Patients with  $\geq 1$ -PSI experienced higher-rates of in-hospital mortality (OR: 19.38, 95% CI: 18.44-20.37), prolonged length-of-stay (OR: 4.43, 95%CI: 4.31-4.54) and excessive hospital-charges (OR: 5.21, 95%CI: 5.10-5.32). Patients treated at lower-volume hospitals experienced both higher PSI-events *and* failure-to-rescue rates. While a steady increase in the frequency of PSI-events after major cancer surgery has

1  
2  
3 occurred over the last 10 years (estimated annual % change-EAPC: 3.5%,  
4  
5 p<0.001), a concomitant decrease in failure-to-rescue rates (EAPC: -3.01%) and  
6  
7 overall mortality (EAPC: -2.30%) was noted. (All p<0.001)  
8  
9

10 **Conclusions:** Over the past decade, there has been a substantial increase in  
11  
12 the national frequency of potentially avoidable adverse-events after major cancer  
13  
14 surgery, with a detrimental effect on numerous outcome-level measures.  
15  
16 However, there was a concomitant reduction in failure-to-rescue rates and  
17  
18 overall-mortality rates. Policy changes to improve the increasing burden of  
19  
20 specific adverse events, such as postoperative sepsis, pressure ulcers and  
21  
22 respiratory failure, are required.  
23  
24  
25  
26  
27  
28  
29  
30  
31  
32  
33  
34  
35  
36  
37  
38  
39  
40  
41  
42  
43  
44  
45  
46  
47  
48  
49  
50  
51  
52  
53  
54  
55  
56  
57  
58  
59  
60

## Article summary

### Article focus

- Variations in the quality of surgical oncology care in the U.S. remain unclear.
- Payers are increasingly assessing structure-and process-level measures to promote quality improvement.
- Hospital-acquired-adverse events are one such measure and we examine their national trends after major cancer surgery.

### Key messages

- Over the past decade, there has been a substantial increase in the national frequency of potentially avoidable adverse-events after major cancer surgery but there was also a concomitant reduction in failure-to-rescue rates and overall-mortality rates.
- Patients treated at lower-volume hospitals experienced both higher frequency of potentially avoidable adverse-events *and* failure-to-rescue rates.
- Policy changes to improve the increasing burden of specific adverse events, such as postoperative sepsis, pressure ulcers and respiratory failure, are required.

### Strength and limitations of this study

- This is the largest study to assess the quality of oncologic surgical care in a nationally representative cohort of U.S. patients.
- Validated Agency for Healthcare Research and Quality Patient Safety Indicators (PSIs) were utilized to identify trends in hospital-acquired-adverse events.
- Inherent to retrospective analyses of large administrative datasets, this study is limited by potential biases due to case-mix and miscoding.
- While PSIs have been shown to perform well as screening tools from an epidemiologic perspective (over-identification and few false-negatives), concerns related to high false-positive rates exist.



## INTRODUCTION

There has been much interest in assessing the downstream effects and complexities of the contemporary delivery of health care. However, observational studies examining preventable adverse events are confounded by the loss of information when administrative data are abstracted from patient records. Recently, several initiatives have been directed to improve consistency, relevance and fidelity in the process of transforming clinical data into administrative datasets and subsequent practice-changing results. Following a landmark study by Iezzoni *et al*<sup>1</sup> on computerized algorithms to identify quality of care disparities in administrative datasets, the Agency for Healthcare Research and Quality (AHRQ) developed a standardized system for accrual and reporting of unintended hospital-acquired adverse events, termed patient safety indicators (PSI)<sup>2</sup>. Subsequently, Zhan *et al*<sup>3</sup> examined the relationship between multiple process-, setting- and outcome-level measures and adverse events identified using the AHRQ's PSI system, and reported substantial but variable effects on the health care system.

Nonetheless, there is a paucity of studies evaluating the burden of preventable adverse events<sup>4</sup> and this is particularly true for major surgical oncology care in the United States. Multiple studies have demonstrated that significant variation exists in cancer incidence rates<sup>5</sup> and in access to quality cancer care<sup>6 7</sup>, but variations in the actual *quality* of surgical oncology care remain unclear.

Hence, we undertook a national assessment of the quality of major surgical oncology care within a standardized framework of preventable adverse events to

1  
2  
3 examine trends in patient safety within the United States. We also evaluate the  
4  
5 prevailing hypothesis<sup>8-10</sup> explaining the volume-complication-mortality  
6  
7 relationship, which states that higher mortality rates for patients undergoing  
8  
9 surgery at low-volume hospitals is preferentially explained by higher failure-to-  
10  
11 rescue rates (i.e. mortality after a hospital-acquired adverse event), rather than a  
12  
13 higher incidence of such adverse events in the first place.  
14  
15  
16  
17  
18  
19  
20  
21  
22  
23  
24  
25  
26  
27  
28  
29  
30  
31  
32  
33  
34  
35  
36  
37  
38  
39  
40  
41  
42  
43  
44  
45  
46  
47  
48  
49  
50  
51  
52  
53  
54  
55  
56  
57  
58  
59  
60

## METHODS

### Data source

The Nationwide Inpatient Sample (NIS) consists of an array of longitudinal hospital inpatients datasets as part of the Healthcare Cost and Utilization Project (HCUP). It was established by the Agency for Healthcare Research and Quality and functions through a Federal-state affiliation. It is the largest publicly accessible all-payer inpatient database<sup>11</sup>. The database consists of discharge information from 8 million inpatient visits and patients covered by multiple insurance types (including Medicare, Medicaid, private insurance and uninsured patients) are represented.

### Study cohort

We relied on hospital discharges for patients undergoing one of eight major cancer surgeries in the United States between 1999-2009. The major oncological surgeries consisted of colectomy, cystectomy, esophagectomy, gastrectomy, hysterectomy, pneumonectomy/lobectomy, pancreatectomy, and prostatectomy. Oncological indications were selected based on ICD-9-CM diagnostic codes. These particular procedures were chosen based on procedure volume and care was taken to include cancer surgeries involving different organ systems across a range of surgical specialties.

### Patient and Hospital information

1  
2  
3 Patient characteristics evaluated included age at inpatient hospitalization, race,  
4  
5 gender, insurance characteristics and comorbidities. Regarding race, patients  
6  
7 were classified as White, Black, Hispanic and Other (Asian or Pacific Islander,  
8  
9 Native American). Regarding insurance characteristics patients were categorized  
10  
11 based on the primary payer: Medicare, Medicaid, Private insurance (Blue Cross,  
12  
13 commercial carriers, private HMO's and PPO's), and other insurance types  
14  
15 (including uninsured patients). Charlson Comorbidity index (CCI) was derived  
16  
17 according to Charlson *et al*<sup>12</sup>, and adapted according to the previously defined  
18  
19 methodology of Deyo and colleagues<sup>13</sup>. Median household income of the  
20  
21 patient's ZIP code of residence, as derived from the US Census, was used as to  
22  
23 define socioeconomic status and patients were divided into quartiles: <25,000\$,  
24  
25 25,000\$–34,999\$, 35,000\$–44,999\$, and ≥45,000\$. Hospital information  
26  
27 examined included hospital location (urban vs. rural) and region (Northeast,  
28  
29 Midwest, South and West), as defined by the United States Census Bureau<sup>14</sup> and  
30  
31 academic teaching status as derived from the AHA Annual Survey of Hospitals.  
32  
33 Hospital volume was categorized into volume quartiles as previously described<sup>15</sup>.  
34  
35  
36  
37  
38  
39  
40  
41  
42  
43

### 44 **Primary Outcomes**

45  
46 The Agency for Healthcare Research and Quality (AHRQ) Patient Safety  
47  
48 Indicators (PSIs) were used to identify potentially preventable hospital-acquired  
49  
50 adverse events. For the PSI project, AHRQ commissioned experts from the  
51  
52 Evidence based Practice Center at the University of California San Francisco and  
53  
54 Stanford University and from the University of California Davis to evaluate the  
55  
56  
57  
58  
59  
60

1  
2  
3 existing literature and help develop an evidence-based approach for improving  
4 patient safety<sup>2</sup>. The objective of this project was to facilitate the identification,  
5  
6 quantification and reporting of preventable hospital-acquired adverse events from  
7  
8 routinely collected administrative information. The process of identification of PSI  
9  
10 included initial literature analysis of previously reported patient safety problems,  
11  
12 organized peer review of chosen PSIs, structured review of ICD-9 codes for each  
13  
14 PSI and finally empirical analysis of each PSI, and feedback from  
15  
16 multidisciplinary teams (physicians and specialists, nurses, pharmacists and  
17  
18 coding and experts)<sup>2</sup>. The complete set of PSIs utilized is displayed in **Table e1**  
19  
20 and is available on the AHRQ website<sup>16</sup>. The list includes various preventable  
21  
22 adverse events that have been shown to have reasonable accuracy and validity  
23  
24 as indicators for enhancing quality improvement and patient safety.  
25  
26  
27  
28  
29  
30  
31  
32  
33

### 34 **Statistical Analysis**

35  
36 Proportions, frequencies, means, medians, standard deviation, and interquartile  
37  
38 ranges were obtained for each variable. National trends in the frequency of PSI-  
39  
40 events, failure-to-rescue (defined as mortality after a PSI-event), and in-hospital  
41  
42 mortality were also analyzed as the estimated annual percentage change  
43  
44 (EAPC), based on the linear regression methodology described by Anderson *et*  
45  
46 *al*<sup>17</sup>. Logistic regression models were used to examine predictors of PSI events,  
47  
48 and to examine the effect of PSI events on multiple outcomes level measures,  
49  
50 including in-hospital mortality, excessive charges ( $\geq 75^{\text{th}}$  percentile of inflation  
51  
52 adjusted charges for each individual procedure) and prolonged length of stay  
53  
54  
55  
56  
57  
58  
59  
60

1  
2  
3 (≥75<sup>th</sup> percentile of each individual procedure). Subsequently, we examined the  
4  
5 volume-complication-mortality relationship in overall and procedure-specific  
6  
7 analyses to study the relationship between mortality at low volume hospitals and  
8  
9 failure-to-rescue rates. Generalized estimating equations were used in each  
10  
11 multivariable analysis to adjust for clustering among hospitals<sup>18</sup>. All analyses  
12  
13 were two-sided, significance was defined as  $P < 0.05$  and were performed using  
14  
15 the R statistical package (R foundation for Statistical Computing, version 2.15.1).  
16  
17  
18  
19  
20  
21  
22  
23  
24  
25  
26  
27  
28  
29  
30  
31  
32  
33  
34  
35  
36  
37  
38  
39  
40  
41  
42  
43  
44  
45  
46  
47  
48  
49  
50  
51  
52  
53  
54  
55  
56  
57  
58  
59  
60

## RESULTS

The baseline demographic characteristics of our cohort of patients >18 years old undergoing one of eight major cancer procedures in the United States between 1999-2009 (n=2,508,917) is shown in **Table 1**. A weighted estimate of 324,852 patients experienced  $\geq 1$ -PSI event (12.9%). Patients with  $\geq 1$ -PSI event were more likely to be older, be female, have higher CCI, participate in Medicare, have lower socioeconomic status, and be treated at lower volume non-academic hospitals when compared to patients who did not experience any hospital-acquired preventable adverse events.

The national trends in PSI rates, overall mortality rates and failure-to-rescue rates in patients undergoing major cancer surgery in the United States are depicted in **Figure 1**. While a steady increase in the frequency of PSI-events after major cancer surgery has occurred over the last 10 years (estimated annual % change-EAPC: 3.5%; 95% Confidence Interval-95% CI: 2.8% to 4.1%;  $P<0.001$ ), a concomitant decrease in failure-to-rescue rates (EAPC: -3.0%; 95% CI: -3.4% to -2.6%;  $P<0.001$ ) and overall mortality (EAPC: -2.3%; 95% CI: -2.7% to -1.9%;  $P<0.001$ ) was noted.

While there was a significant increase in overall PSI event rates over the course of the study, substantial heterogeneity was noted in terms of individual PSIs (**Figure 2 a-c**). Substantial increases were noted in the annual incidence of postoperative sepsis (EAPC: 14.1%, 95% CI: 12.0% to 16.2%;  $P<0.001$ ), pressure ulcer (EAPC: 13.4%, 95% CI: 10.2% to 16.6%;  $P<0.001$ ) and respiratory failure (EAPC: 5.6%, 95% CI: 4.8% to 6.4%;  $P<0.001$ ), while

1  
2  
3 significant advances were made in the prevention of anesthetic complications  
4 (EAPC: -17.5%, 95% CI: -27.6% to -7.5%; P=0.008), hip fractures (EAPC: -8.9%,  
5  
6 95% CI: -13.6% to -4.3%; P=0.005) and transfusion reactions (EAPC: -7.9%,  
7  
8 95% CI: -13.1% to -2.8%; P=0.001) in the perioperative period.

9  
10  
11 Results of a multivariable logistic regression model predicting the odds of  $\geq 1$ -PSI  
12 event after major cancer surgery are shown in **Table 2**. These factors included:  
13 female gender (vs. male, odds ratio-OR: 0.88, 95% confidence interval-CI: 0.86-  
14 0.90; P<0.001), Black race (vs. Caucasians OR: 1.17, 95%CI: 1.13-1.21;  
15 P<0.001), higher Charlson comorbidity index ( $\geq 3$  vs. 0, OR: 1.38, 95%CI: 1.34-  
16 1.42; P<0.001), Medicaid (OR: 1.45, 95%CI: 1.39-1.52) and Medicare insurance  
17 (OR: 1.16, 95%CI: 1.13-1.19; P<0.001), lower median household income (4<sup>th</sup>  
18 quartile vs. 1<sup>st</sup> quartile, OR-0.92, 95%CI: 0.89-0.95; P<0.001) and surgeries at  
19 lower volume hospitals (4<sup>th</sup> quartile vs. 1<sup>st</sup> quartile, OR: 0.76, 95%CI: 0.74-0.78;  
20 P<0.001).  
21  
22  
23  
24  
25  
26  
27  
28  
29  
30  
31  
32  
33  
34  
35

36 The occurrence of  $\geq 1$ -PSI event had significant multivariable effects on specific  
37 outcome-level measures after major cancer surgery (**Table 3**). Patients who  
38 suffered from  $\geq 1$ -PSI event experienced higher rates of in-hospital mortality (OR:  
39 19.38, 95% CI: 18.44-20.37), prolonged length of stay (OR: 4.43, 95%CI: 4.31-  
40 4.54) and excessive hospital charges (OR: 5.21, 95%CI: 5.10-5.32).  
41  
42  
43  
44  
45  
46  
47

48 We also assessed the effect of hospital volume on the incidence of PSIs and  
49 failure-to-rescue (**Table 4**). In the overall analysis of patients undergoing any of  
50 the eight procedures, very high-volume hospitals (4<sup>th</sup> quartile) had both lower PSI  
51 event rate *and* lower failure-to-rescue rates. However, this relationship was  
52  
53  
54  
55  
56  
57  
58  
59  
60



1  
2  
3 procedure-specific: for colectomy, esophagectomy, lung resection,  
4  
5  
6 pancreatectomy, and prostatectomy, very high-volume hospitals had both lower  
7  
8 PSI event rates *and* lower failure-to-rescue rates. For gastrectomy, very high-  
9  
10 volume hospitals did not have lower PSI event rates but did have lower failure-to-  
11  
12 rescue rates; for hysterectomy very high-volume hospitals had *higher* PSI event  
13  
14 rates, but had lower failure-to-rescue rates; for cystectomy very high volume-  
15  
16 hospitals had lower PSI event rates and a trend toward lower failure-to-rescue  
17  
18 rates.  
19  
20  
21  
22  
23  
24  
25  
26  
27  
28  
29  
30  
31  
32  
33  
34  
35  
36  
37  
38  
39  
40  
41  
42  
43  
44  
45  
46  
47  
48  
49  
50  
51  
52  
53  
54  
55  
56  
57  
58  
59  
60

## DISCUSSION

Recently, it has been estimated that the annual cost of medical errors is over 17 billion dollars<sup>19</sup> and there have been a slew of newer initiatives over the last decade to incentivize better quality care. In 2008, Medicare announced that it would restrain the ability of hospitals to get reimbursed for 'reasonably preventable events': avoidable medical errors ranging from pressure ulcers, falls and transfusion of incompatible blood to anesthetic complications, deep vein thrombosis and foreign bodies left in the body of patients during surgery. These and other initiatives are designed to place the burden of responsibility for such hospital-acquired adverse events squarely on hospitals and physicians<sup>20</sup>. While these initiatives have been met with stiff objection from hospital administrations, the Centers for Medicaid and Medicare Services (CMS) has been consistent in its position that accountability for such events should rest with hospitals and not with the taxpayer<sup>20</sup>. The Affordable Care Act of 2010 has added newer dimensions to these quality-improvement initiatives, with reimbursement likely to be dependent on both adherence to standards of care and the perceptions of patients with regard to hospital performance as measured by surveys<sup>21</sup>.

A rational approach to improving accountability for substandard care should begin with identifying the true burden of hospital-acquired adverse events. This would be particularly useful in identifying specific adverse events that warrant special attention by payers like CMS and in preferential allocation of resources by hospitals due to the growing temporal burden of such events.

1  
2  
3  
4  
5  
6  
7  
8  
9  
10  
11  
12  
13  
14  
15  
16  
17  
18  
19  
20  
21  
22  
23  
24  
25  
26  
27  
28  
29  
30  
31  
32  
33  
34  
35  
36  
37  
38  
39  
40  
41  
42  
43  
44  
45  
46  
47  
48  
49  
50  
51  
52  
53  
54  
55  
56  
57  
58  
59  
60

In the current study, we report contemporary trends in the frequency of hospital-acquired adverse events after major surgical oncology care in the United States. Our study has a number of novel findings. First, we report a gradual increase in the national frequency of hospital-acquired adverse events after major cancer surgery over the last decade. This is important as it represents a decline, albeit small and gradual, in the quality of surgical oncology care at the national level, as measured by the primary prevention of PSI events. The increase may be attributed to changes in case-mix, including an aging population. Conversely, the emergence of multi-resistant bacteria may contribute to the recorded trends.<sup>22 23</sup>

Second, a simultaneous decrease in failure-to-rescue rates were observed and may indicate that while primary prevention of hospital-acquired adverse events has deteriorated, early recognition and timely management of these complications may have improved in the last decade. These findings may explain the significant annual reduction in mortality for patients undergoing major cancer surgery. Nonetheless, alternate explanations include refinements in coding practices, which may have led to better recognition and recording of non-lethal adverse events, thereby resulting in an apparent decrease in mortality rates.

Third, significant heterogeneity in the temporal dynamics of specific hospital-acquired adverse events was noted. While marked and worrisome increases were recorded in the frequency of postoperative sepsis, pressure ulcers and respiratory failure, advances were made in the prevention of anesthetic complications, transfusion-related complications and hip fractures. Thus we

1  
2  
3 identify numerous setting- and process-level measures where resources need to  
4 be refocused for further improvement in the quality of surgical oncology care.  
5  
6

7  
8 We also examined the volume-complication-mortality dynamic in patients  
9  
10 undergoing major cancer surgery, as it applies to potentially preventable hospital  
11 acquired adverse events (PSI). There is a well-established body of evidence  
12 describing the volume-mortality relationship in patients undergoing major cancer  
13 procedures and other surgeries. Dudley *et al*<sup>24</sup> examined patients undergoing  
14 one of eleven diverse procedures (ranging from coronary angioplasty to  
15 esophageal cancer surgery) in California and concluded that 602 deaths could be  
16 prevented annually by transferring patients from low-volume to high-volume  
17 hospitals. Birkmeyer *et al*<sup>25</sup> reported that Medicare patients treated at very high-  
18 volume hospitals experienced up to a 12 percent difference in absolute mortality  
19 for certain procedures relative to patients treated at very low-volume hospitals.  
20  
21 However, the underlying mechanisms explaining the volume-mortality  
22 relationship have not been elucidated clearly. Silber *et al*<sup>26</sup> first introduced the  
23 concept of 'failure-to-rescue' in a seminal report that evaluated patients  
24 undergoing cholecystectomy or transurethral prostatectomy. They concluded that  
25 overall mortality was related to both hospital-level and patient-level factors, while  
26 adverse events were related to patient-level factors at admission (severity of  
27 illness). However, failure-to-rescue was preferentially associated with hospital-  
28 level factors and thus the underlying dynamics for failure-to-rescue were different  
29 than that for overall mortality and adverse events. The current hypothesis<sup>8</sup>  
30 regarding the volume-complication-mortality relationship is that lower volume  
31  
32  
33  
34  
35  
36  
37  
38  
39  
40  
41  
42  
43  
44  
45  
46  
47  
48  
49  
50  
51  
52  
53  
54  
55  
56  
57  
58  
59  
60

1  
2  
3 hospitals experience higher mortality rates not because of higher complication  
4 rates, but due to lower failure-to-rescue rates. Ghaferi *et al*<sup>10</sup> demonstrated that  
5 high and low volume hospitals enrolled in the National Surgical Quality  
6 Improvement Program (NSQIP) had similar complication rates but different  
7 failure-to-rescue rates for multiple procedures. In a subsequent analysis<sup>9</sup> of  
8 patients undergoing gastrectomy, pancreatectomy or esophagectomy, similar  
9 results were demonstrated. However, in the current study, very high-volume  
10 hospitals (4<sup>th</sup> quartile vs. 1<sup>st</sup> quartile) had both lower PSI-event rates *and* lower  
11 failure-to-rescue rates. Importantly, the volume-complication-mortality  
12 relationship, as it applies to PSI events, appears to be procedure-specific and  
13 heterogeneous, with the current hypothesis not accounting for multiple individual  
14 major cancer surgeries, namely colectomy, esophagectomy, lung resection,  
15 pancreatectomy and prostatectomy. This is an important point: CMS currently  
16 focuses its quality-improvement initiatives on complication rates, and explicit  
17 demonstration that lower failure-to-rescue rates and not higher complication rates  
18 underlie the substandard care at low-volume hospitals may require a re-  
19 consideration of these initiatives. Our findings indicate that the prevailing  
20 hypothesis may need to be re-evaluated, at least for patients undergoing major  
21 cancer surgery. In fact, for patients undergoing hysterectomy, this relationship is  
22 reversed, with patients at very high-volume hospitals experiencing *higher* PSI  
23 event rates and lower failure-to-rescue rates. The underlying reason for this  
24 finding is not clear. Previous studies<sup>27</sup> have questioned the impact of hospital  
25 volume on hysterectomy outcomes and have reported that surgeon volume  
26  
27  
28  
29  
30  
31  
32  
33  
34  
35  
36  
37  
38  
39  
40  
41  
42  
43  
44  
45  
46  
47  
48  
49  
50  
51  
52  
53  
54  
55  
56  
57  
58  
59  
60

1  
2  
3 trumps hospital volume as the predominant factor underlying the volume-  
4  
5 outcomes relationship for hysterectomy. While inclusion of surgeon volume may  
6  
7 alter these findings, the higher rates of adverse events in patients undergoing  
8  
9 hysterectomy at very high-volume hospitals may need to be re-examined in  
10  
11 future reports.  
12  
13

14  
15 Our study is not without limitations. The drawbacks of using administrative data  
16  
17 are well known<sup>28</sup>, including limitations regarding risk-adjustment and miscoding.  
18  
19 While PSIs have been shown to perform well as screening tools from an  
20  
21 epidemiologic perspective (over-identification and few false-negatives), problems  
22  
23 related to high false-positive rates exist, with most validation studies reporting  
24  
25 positive predictive values of between 43 to >90%<sup>29 30</sup>. While it is clear that these  
26  
27 drawbacks limit the use of PSIs to make reimbursement decisions or to compare  
28  
29 hospitals, it is unclear how it affects the implications of our study, where it was  
30  
31 used as a screening tool to *identify* adverse events<sup>29 30</sup>. Secondly, morbidity and  
32  
33 mortality events in the NIS are characterized based on the index admission, and  
34  
35 subsequent readmissions, while relevant, are not recorded. This may have  
36  
37 resulted in under-recognition of the true burden of adverse events, mortality and  
38  
39 charges after the initial cancer surgery. Third: while the heterogeneity identified in  
40  
41 the volume-complication-mortality relationship is a key finding in the present  
42  
43 report, our study design does not allow for the identification of underlying  
44  
45 mechanisms explaining these results. It is also important to emphasize that, in  
46  
47 contrast to the previously cited studies where overall complication rates were  
48  
49 examined, we evaluated potentially preventable hospital acquired events only.  
50  
51  
52  
53  
54  
55  
56  
57  
58  
59  
60

1  
2  
3 Previous investigators have shown that this restricted definition has limitations  
4 since not all deaths are accounted for in a given population sample<sup>31</sup>;  
5  
6 alternatively, these drawbacks may not apply to studies focusing on patient  
7  
8 safety using PSI as a quality of care measure. Hence, while it may not be illogical  
9  
10 to expect lower volume hospitals to provide substandard care secondary to both  
11  
12 higher rates of preventable adverse events *and* higher failure-to-rescue rates, it  
13  
14 is certainly possible that a majority of hospital-acquired complications are an  
15  
16 inevitable result of procedure complexity and patient comorbidities (and not just a  
17  
18 failure of setting-level prevention measures). Consequently, while more rigorous  
19  
20 patient care pathways might explain the lower incidence of preventable adverse  
21  
22 events and subsequent mortality in higher volume hospitals, for the majority of  
23  
24 (non-preventable) adverse events, the incidence rates would be the same  
25  
26 regardless of hospital volume with lower failure-to-rescue rates preferentially  
27  
28 explaining the low mortality rates of higher volume hospitals. Further  
29  
30 investigation of these findings is required to test these possibilities and to fully  
31  
32 understand the underlying dynamics of the volume-mortality relationship.  
33  
34  
35  
36  
37  
38  
39  
40  
41  
42  
43  
44  
45  
46  
47  
48  
49  
50  
51  
52  
53  
54  
55  
56  
57  
58  
59  
60

## CONCLUSION

Over the past decade, there has been a substantial increase in the national frequency of potentially avoidable hospital-acquired adverse events after major cancer surgery, with a detrimental effect on numerous outcome-level measures. However, there was a concomitant reduction in failure-to-rescue rates and, consequently, overall-mortality rates. Policy changes and resource re-allocation to improve the increasing burden of specific adverse events, such as postoperative sepsis, pressure ulcer and respiratory failure, are required.



1  
2  
3 **ACKNOWLEDGEMENTS:** None  
4  
5  
6  
7

8 **COMPETING INTEREST AND FUNDING:** No potential conflicts of interest. No  
9  
10 source of financial or material support for the preparation of this manuscript. No  
11  
12 Disclaimers.  
13  
14  
15  
16  
17  
18  
19  
20  
21  
22  
23  
24  
25  
26  
27  
28  
29  
30  
31  
32  
33  
34  
35  
36  
37  
38  
39  
40  
41  
42  
43  
44  
45  
46  
47  
48  
49  
50  
51  
52  
53  
54  
55  
56  
57  
58  
59  
60

## REFERENCES

1. Iezzoni LI, Foley SM, Heeren T, Daley J, Duncan CC, Fisher ES, et al. A method for screening the quality of hospital care using administrative data: preliminary validation results. *QRB. Quality review bulletin* 1992;18(11):361-71.
2. [http://www.qualityindicators.ahrq.gov/modules/psi\\_resources.aspx](http://www.qualityindicators.ahrq.gov/modules/psi_resources.aspx) Accessed on 9/9/12.
3. Zhan C, Miller MR. Excess length of stay, charges, and mortality attributable to medical injuries during hospitalization. *JAMA : the journal of the American Medical Association* 2003;290(14):1868-74.
4. Downey JR, Hernandez-Boussard T, Banka G, Morton JM. Is patient safety improving? National trends in patient safety indicators: 1998-2007. *Health services research* 2012;47(1 Pt 2):414-30.
5. Siegel R, Naishadham D, Jemal A. Cancer statistics, 2012. *CA Cancer J Clin* 2012;62(1):10-29.
6. Ross JS, Bradley EH, Busch SH. Use of health care services by lower-income and higher-income uninsured adults. *JAMA : the journal of the American Medical Association* 2006;295(17):2027-36.
7. Liu JH, Zingmond DS, McGory ML, SooHoo NF, Ettner SL, Brook RH, et al. Disparities in the utilization of high-volume hospitals for complex surgery. *JAMA* 2006;296(16):1973-80.
8. Ghaferi AA, Dimick JB. Variation in mortality after high-risk cancer surgery: failure to rescue. *Surgical oncology clinics of North America* 2012;21(3):389-95, vii.
9. Ghaferi AA, Birkmeyer JD, Dimick JB. Hospital volume and failure to rescue with high-risk surgery. *Medical care* 2011;49(12):1076-81.
10. Ghaferi AA, Birkmeyer JD, Dimick JB. Variation in hospital mortality associated with inpatient surgery. *The New England journal of medicine* 2009;361(14):1368-75.
11. <http://www.hcup-us.ahrq.gov/nisoverview.jsp> (Accessed on 9/9/12).
12. Charlson ME, Pompei P, Ales KL, MacKenzie CR. A new method of classifying prognostic comorbidity in longitudinal studies: development and validation. *Journal of chronic diseases* 1987;40(5):373-83.
13. Deyo R, Cherkin D, Ciol M. Adapting a clinical comorbidity index for use with ICD-9-CM administrative databases. *J Clin Epidemiol* 1992;45(6):613-9.
14. United States Census Bureau. 2000 [cited 2010]; Available from: <http://www.census.gov> .
15. Trinh QD, Sun M, Sammon J, Bianchi M, Sukumar S, Ghani KR, et al. Disparities in access to care at high-volume institutions for uro-oncologic procedures. *Cancer* 2012;118(18):4421-6.
16. [http://www.qualityindicators.ahrq.gov/Modules/PSI\\_TechSpec.aspx](http://www.qualityindicators.ahrq.gov/Modules/PSI_TechSpec.aspx) (Accessed on 9/9/12).
17. Anderson WF, Camargo MC, Fraumeni JF, Jr., Correa P, Rosenberg PS, Rabkin CS. Age-specific trends in incidence of noncardia gastric cancer in US adults. *JAMA : the journal of the American Medical Association* 2010;303(17):1723-8.

18. Panageas KS, Schrag D, Riedel E, Bach PB, Begg CB. The effect of clustering of outcomes on the association of procedure volume and surgical outcomes. *Annals of internal medicine* 2003;139(8):658-65.
19. Van Den Bos J, Rustagi K, Gray T, Halford M, Ziemkiewicz E, Shreve J. The \$17.1 billion problem: the annual cost of measurable medical errors. *Health affairs (Project Hope)* 2011;30(4):596-603.
20. Milstein A. Ending extra payment for "never events"--stronger incentives for patients' safety. *The New England journal of medicine* 2009;360(23):2388-90.
21. <http://patients.about.com/od/AffordableCareAct/a/Affordable-Care-Act-And-Patient-Satisfaction-In-Hospitals.htm> Accessed on 9/9/12.
22. Wellington EM, Boxall AB, Cross P, Feil EJ, Gaze WH, Hawkey PM, et al. The role of the natural environment in the emergence of antibiotic resistance in gram-negative bacteria. *The Lancet infectious diseases* 2013;13(2):155-65.
23. Kaye KS, Schmader KE, Sawyer R. Surgical site infection in the elderly population. *Clinical infectious diseases : an official publication of the Infectious Diseases Society of America* 2004;39(12):1835-41.
24. Dudley RA, Johansen KL, Brand R, Rennie DJ, Milstein A. Selective referral to high-volume hospitals: estimating potentially avoidable deaths. *JAMA* 2000;283(9):1159-66.
25. Birkmeyer JD, Siewers AE, Finlayson EV, Stukel TA, Lucas FL, Batista I, et al. Hospital volume and surgical mortality in the United States. *The New England journal of medicine* 2002;346(15):1128-37.
26. Silber JH, Williams SV, Krakauer H, Schwartz JS. Hospital and patient characteristics associated with death after surgery. A study of adverse occurrence and failure to rescue. *Medical care* 1992;30(7):615-29.
27. Wright JD, Lewin SN, Deutsch I, Burke WM, Sun X, Herzog TJ. Effect of surgical volume on morbidity and mortality of abdominal hysterectomy for endometrial cancer. *Obstetrics and gynecology* 2011;117(5):1051-9.
28. Sarrazin MS, Rosenthal GE. Finding pure and simple truths with administrative data. *JAMA : the journal of the American Medical Association* 2012;307(13):1433-5.
29. Henderson KE, Recktenwald A, Reichley RM, Bailey TC, Waterman BM, Diekemper RL, et al. Clinical validation of the AHRQ postoperative venous thromboembolism patient safety indicator. *Joint Commission journal on quality and patient safety / Joint Commission Resources* 2009;35(7):370-6.
30. Kaafarani HM, Borzecki AM, Itani KM, Loveland S, Mull HJ, Hickson K, et al. Validity of selected Patient Safety Indicators: opportunities and concerns. *Journal of the American College of Surgeons* 2011;212(6):924-34.
31. Silber JH, Romano PS, Rosen AK, Wang Y, Even-Shoshan O, Volpp KG. Failure-to-rescue: comparing definitions to measure quality of care. *Medical care* 2007;45(10):918-25.

1  
2  
3 **FIGURE LEGENDS**  
4

5  
6  
7 **FIGURE 1.** National trends in Patient Safety Indicator (PSI) rates, overall  
8 mortality rates and failure-to-rescue rates in patients undergoing major cancer  
9 surgery (MCS) in the United States (1999-2009); EAPC-Estimated Annual  
10 Percent Change  
11  
12  
13  
14  
15  
16  
17

18 **FIGURE 2 a-c.** National trends in individual Patient Safety Indicators over the  
19 study period (1999-2009) in patients undergoing major cancer surgery (MCS) in  
20 the United States  
21  
22  
23  
24  
25  
26  
27  
28  
29  
30  
31  
32  
33  
34  
35  
36  
37  
38  
39  
40  
41  
42  
43  
44  
45  
46  
47  
48  
49  
50  
51  
52  
53  
54  
55  
56  
57  
58  
59  
60

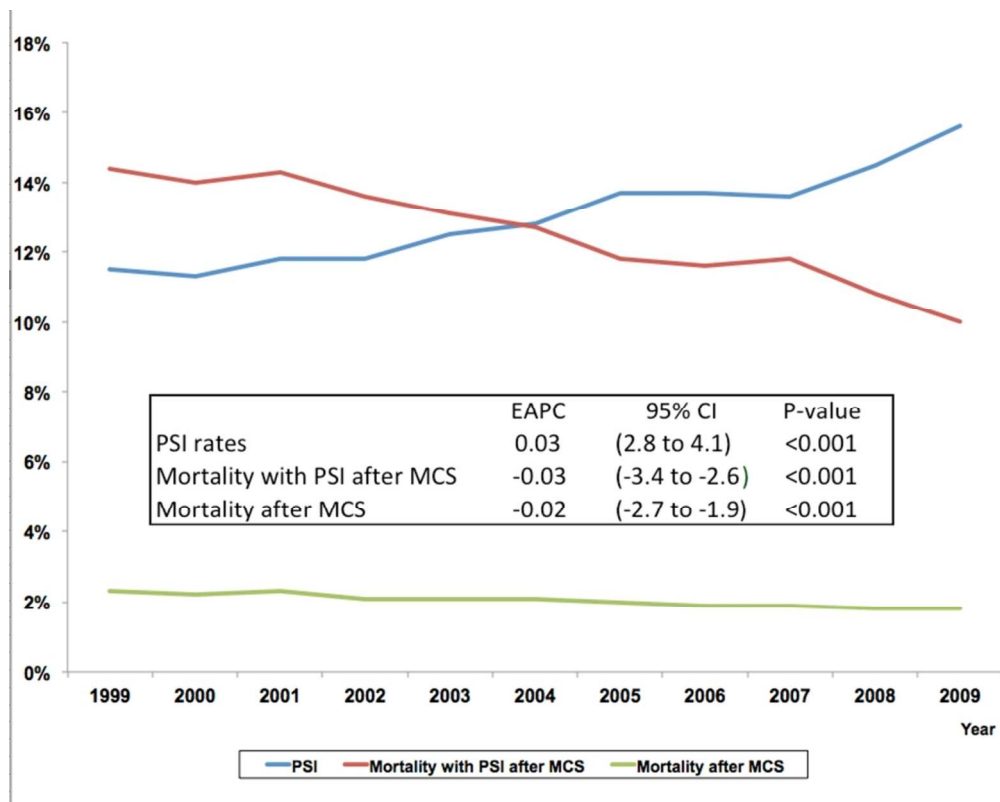

113x90mm (300 x 300 DPI)

ew only

1  
2  
3  
4  
5  
6  
7  
8  
9  
10  
11  
12  
13  
14  
15  
16  
17  
18  
19  
20  
21  
22  
23  
24  
25  
26  
27  
28  
29  
30  
31  
32  
33  
34  
35  
36  
37  
38  
39  
40  
41  
42  
43  
44  
45  
46  
47  
48  
49  
50  
51  
52  
53  
54  
55  
56  
57  
58  
59  
60

1  
2  
3  
4  
5  
6  
7  
8  
9  
10  
11  
12  
13  
14  
15  
16  
17  
18  
19  
20  
21  
22  
23  
24  
25  
26  
27  
28  
29  
30  
31  
32  
33  
34  
35  
36  
37  
38  
39  
40  
41  
42  
43  
44  
45  
46  
47  
48  
49  
50  
51  
52  
53  
54  
55  
56  
57  
58  
59  
60

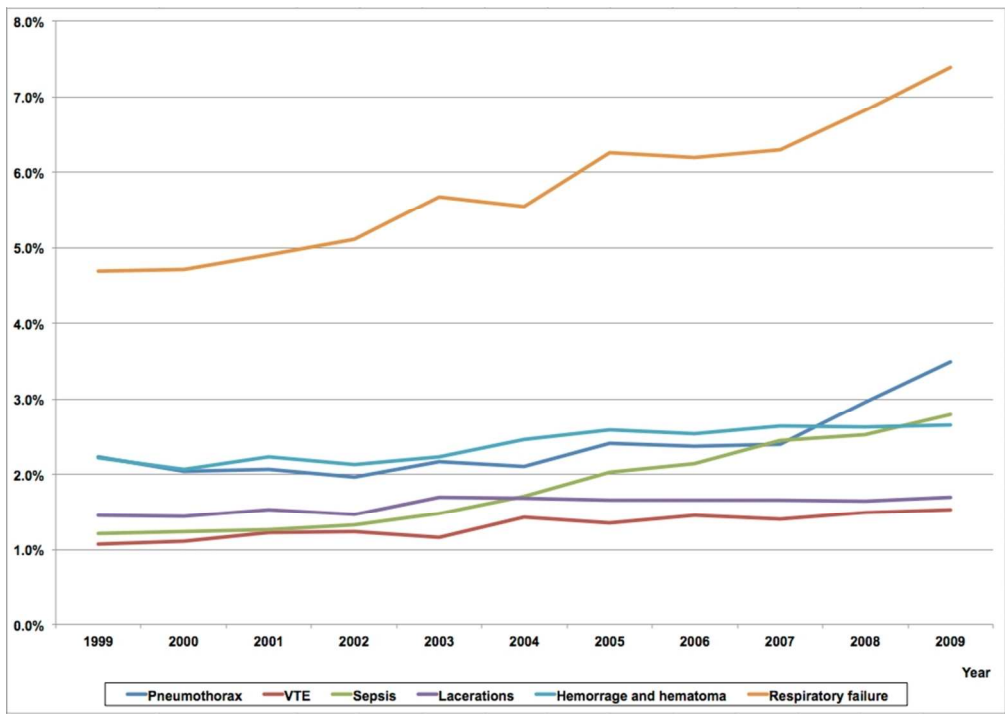

127x90mm (300 x 300 DPI)

view only

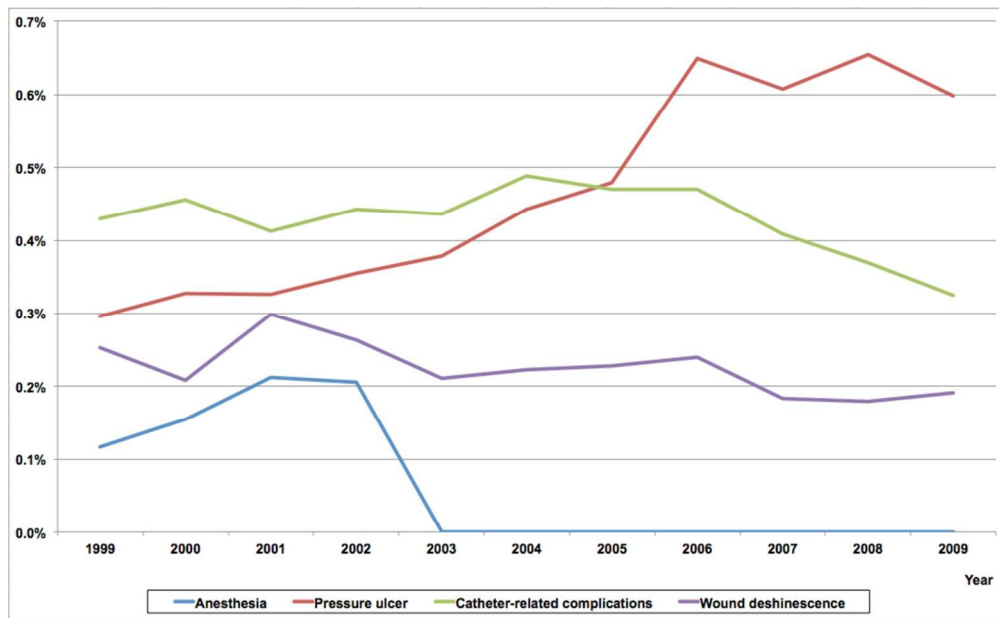

145x90mm (300 x 300 DPI)

Review only

1  
2  
3  
4  
5  
6  
7  
8  
9  
10  
11  
12  
13  
14  
15  
16  
17  
18  
19  
20  
21  
22  
23  
24  
25  
26  
27  
28  
29  
30  
31  
32  
33  
34  
35  
36  
37  
38  
39  
40  
41  
42  
43  
44  
45  
46  
47  
48  
49  
50  
51  
52  
53  
54  
55  
56  
57  
58  
59  
60

1  
2  
3  
4  
5  
6  
7  
8  
9  
10  
11  
12  
13  
14  
15  
16  
17  
18  
19  
20  
21  
22  
23  
24  
25  
26  
27  
28  
29  
30  
31  
32  
33  
34  
35  
36  
37  
38  
39  
40  
41  
42  
43  
44  
45  
46  
47  
48  
49  
50  
51  
52  
53  
54  
55  
56  
57  
58  
59  
60

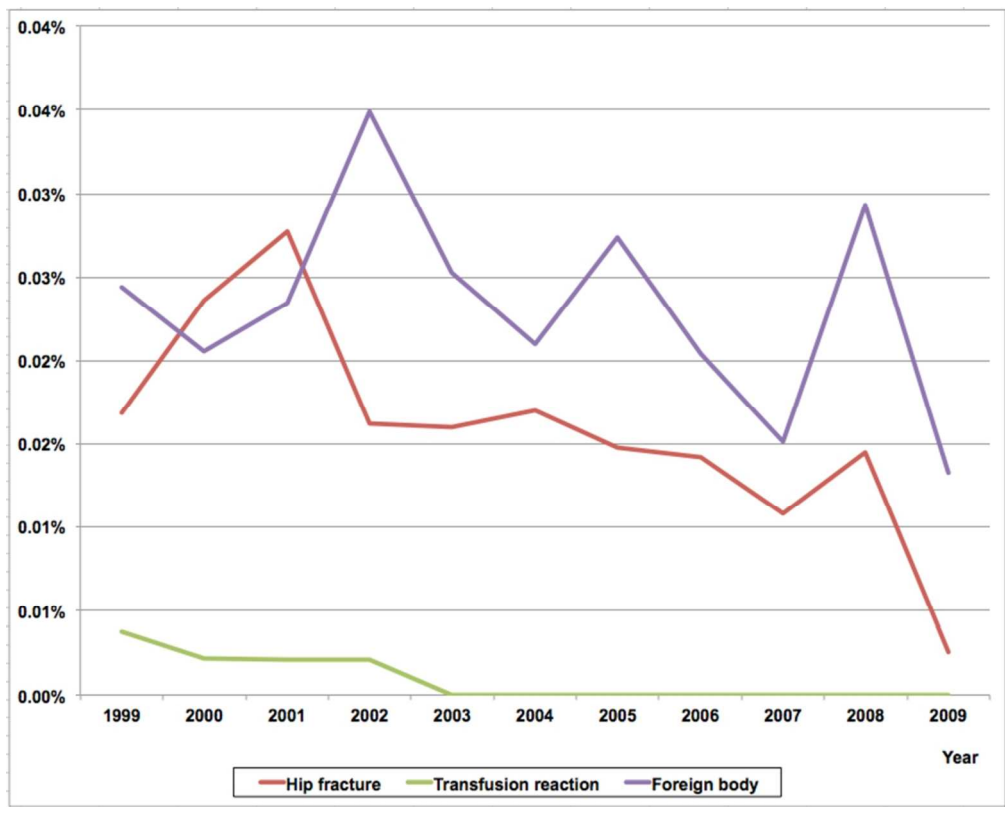

112x90mm (300 x 300 DPI)

Peer review only
